1 **The role of glutathione in periplasmic redox homeostasis and oxidative protein folding**  
2 **in *Escherichia coli***

3

4 Lisa R. Knoke<sup>1</sup>, Jannik Zimmermann<sup>2</sup>, Natalie Lupilov<sup>1</sup>, Jannis F. Schneider<sup>1</sup>, Beyzanur  
5 Celebi<sup>1</sup>, Bruce Morgan<sup>2</sup> and Lars I. Leichert<sup>1</sup>

6 <sup>1</sup> Ruhr University Bochum, Institute of Biochemistry and Pathobiochemistry, Microbial  
7 Biochemistry, Bochum, Germany

8 <sup>2</sup> Institute of Biochemistry, Centre for Human and Molecular Biology (ZHMB), Saarland  
9 University, 66123 Saarbrücken, Germany

10

11 \*Corresponding author: Lars I. Leichert; [lars.leichert@ruhr-uni-bochum.de](mailto:lars.leichert@ruhr-uni-bochum.de)

## 12 **Abstract**

13 The thiol redox balance in the periplasm of *E. coli* depends on the DsbA/B pair for oxidative  
14 power and the DsbC/D system as its complement for isomerization of non-native disulfides.  
15 While the standard redox potentials of those systems are known, the *in vivo* redox potential  
16 imposed onto protein thiol disulfide pairs in the periplasm remains unknown. Here, we used  
17 genetically encoded redox probes (roGFP2 and roGFP-iL), targeted to the periplasm, to  
18 directly probe the thiol redox homeostasis in this compartment. These probes contain two  
19 cysteine residues, that are virtually completely reduced in the cytoplasm, but once exported  
20 into the periplasm, can form a disulfide bond, a process that can be monitored by fluorescence  
21 spectroscopy. Even in the absence of DsbA, roGFP2, exported to the periplasm, was fully  
22 oxidized, suggesting the presence of an alternative system for the introduction of disulfide  
23 bonds into exported proteins. However, the absence of DsbA shifted the periplasmic thiol-  
24 redox potential from -228 mV to a more reducing -243 mV and the capacity to re-oxidize  
25 periplasmic roGFP2 after a reductive pulse was significantly decreased. Re-oxidation in a  
26 DsbA strain could be fully restored by exogenous oxidized glutathione (GSSG), while  
27 reduced GSH accelerated re-oxidation of roGFP2 in the WT. In line, a strain devoid of  
28 endogenous glutathione showed a more reducing periplasm, and was significantly worse in  
29 oxidatively folding PhoA, a native periplasmic protein and substrate of the oxidative folding  
30 machinery. PhoA oxidative folding could be enhanced by the addition of exogenous GSSG in  
31 the WT and fully restored in a  $\Delta dsbA$  mutant. Taken together this suggests the presence of an  
32 auxiliary, glutathione-dependent thiol-oxidation system in the bacterial periplasm.

### 33 **Introduction**

34 Extracellular proteins are stabilized by structural disulfide bonds that are introduced during  
35 oxidative protein folding. Thus, the correct folding of most of the proteins translocated into  
36 the periplasm and beyond in the model bacterium *Escherichia coli* depends on the formation  
37 of native disulfide bonds. The major pathway for introducing disulfide bonds in the periplasm  
38 of *E. coli* involves the DsbA-DsbB thiol oxidase system (Bardwell et al., 1993, 1991; Collet  
39 and Bardwell, 2002; Missiakas et al., 1993; Wunderlich and Glockshuber, 1993). DsbA  
40 contains a thioredoxin-like domain including an active site CxxC motif with a standard redox  
41 potential of around  $-122$  mV (Martin et al., 1993; Wunderlich et al., 1993). After disulfide  
42 introduction, DsbA itself is re-oxidized by the integral membrane protein DsbB, which in turn  
43 is connected to the ubiquinone pool of the bacterial plasma membrane (Christensen et al.,  
44 2016; Inaba et al., 2009; Inaba and Ito, 2008; Manta et al., 2019; Vivian et al., 2009). As some  
45 proteins contain multiple cysteine residues, cells require quality control systems to isomerize  
46 non-native disulfide bonds. In *E. coli*, this system includes the disulfide isomerase DsbC/G  
47 and the reductive power from DsbD, which itself is coupled to the cytoplasmic NADPH pool  
48 through Thioredoxin A (TrxA) (Andersen et al., 1997; Cho and Collet, 2013; Missiakas et al.,  
49 1994; Rietsch et al., 1997; Shevchik et al., 1994; Sone et al., 1997).

50 In eukaryotes, oxidative folding in the endoplasmic reticulum (ER) is catalyzed in a similar  
51 manner by protein disulfide isomerase(s) (PDI), which also contains thioredoxin-like  
52 domains. Unlike DsbA, PDI not only acts as thiol oxidase but also functions as a disulfide  
53 reductase/isomerase (Ali Khan and Mutus, 2014; Ushioda and Nagata, 2019). PDI is re-  
54 oxidized for example by the sulfhydryl oxidase Endoplasmic reticulum oxidoreductin 1  
55 (ERO1- $L\alpha$ ) (Tu and Weissman, 2004).

56 The tripeptide glutathione (GSH) is the most abundant low molecular weight thiol in many  
57 domains of life ranging from bacteria to eukaryotes (Fahey et al., 1978; Smirnova and

58 Oktyabrsky, 2005; Zechmann et al., 2011) and usually it is noted for its reductive properties,  
59 keeping the cytoplasm reduced. In its reducing role, glutathione is oxidized to glutathione  
60 disulfide (GSSG) (Åslund et al., 1994; Carmel-Harel and Storz, 2000; Masip et al., 2006). In  
61 *E. coli*, cytosolic GSH levels have been described to be in the millimolar range (up to  
62 10 mM). The GSH:GSSG ratio ranges from 50:1 to 200:1 and is maintained by the  
63 glutathione reductase Gor, dependent on the cellular NADPH-pool (Åslund et al., 1999;  
64 Fahey et al., 1978; Greer and Perham, 1986; Masip et al., 2006; Meister, 1988; Tuggle and  
65 Fuchs, 1985).

66 Exponentially growing *E. coli* cells extensively secrete GSH into the culture medium. Several  
67 ABC-transporters mediate GSH transport across the inner cell membrane and outer membrane  
68 porins, allow GSH or GSSG to enter or leave the periplasm with around 10 % of all  
69 synthesized GSH being secreted. (Holyoake et al., 2016; Pittman et al., 2005; Smirnova et al.,  
70 2012; Suzuki et al., 2005; Wang et al., 2018). Although glutathione synthesis is restricted to  
71 the cytosol, it is exported into the periplasm of *E. coli* and periplasmic glutathione probably  
72 accounts for 10–30% of total cellular GSH (Eser et al., 2009; Pittman et al., 2005; Smirnova  
73 et al., 2012). It has been suggested that the GSH:GSSG ratio in the periplasm reflects the  
74 GSH:GSSG ratio of the culture medium, being approximately 16:1 (Eser et al., 2009; Pittman  
75 et al., 2005; Smirnova et al., 2012, 2020, 2005; Song et al., 2021).

76 Since redox processes in the cell are highly regulated, the presence of glutathione in the  
77 periplasm at such high levels strongly indicates that this molecule also plays a role in the  
78 redox homeostasis of the periplasm, similar to its role in the ER (Birk et al., 2013; Delaunay-  
79 Moisan et al., 2017). In fact, impaired GSH synthesis or reduced GSH import into the  
80 periplasm is connected to several phenotypes, similar to those found in cells lacking the  
81 DsbA/DsbB- or DsbC-system (Fabianek et al., 2000; Pittman et al., 2005). However, a direct  
82 involvement in disulfide bond formation and redox homeostasis for GSH in the periplasm has  
83 not yet been established.

84 Here, we explore the role of GSH in oxidative protein folding and redox homeostasis in the  
85 periplasm of *E. coli* by targeting genetically encoded redox-sensitive probes with an  
86 engineered disulfide bond to this compartment and analyzing the periplasmic redox dynamics  
87 in the presence or absence of DsbA and/or GSH. We provide evidence that GSH indeed plays  
88 a key role in disulfide bond formation and redox homeostasis in the periplasm: We observed  
89 that GSSG can complement for the loss of DsbA and, unexpectedly, that GSH accelerates  
90 disulfide bond formation in the presence of DsbA. In line, the periplasmic redox balance of  
91 GSH-deficient cells was slightly shifted to a more reducing redox potential and the oxidative  
92 folding of native DsbA substrates in these cells is impaired.

93 **Materials and methods:**

94 *Strains, Plasmids and growth conditions*

95 Bacterial strains and plasmids used in this study are listed in Supplementary tables S1 and S2.

96 *Escherichia coli* DH5 $\alpha$  served as host for plasmid construction and storage and *E. coli* BL21

97 (DE3) was used for DsbA and *E. coli* MG1655 for roGFP2 recombinant protein production.

98 All *E. coli* strains used in this study were routinely cultivated at 37 °C in Luria-Bertani (LB)

99 medium, supplemented with antibiotics when required for plasmid maintenance and marker

100 selection (ampicillin 200  $\mu$ g/mL or kanamycin 100  $\mu$ g/mL), if not stated differently.

101 Protein expression in BL21 was induced with 0.4 mM IPTG when the cultures reached an

102 OD<sub>600</sub> of ~0.6–0.8 at 37 °C in LB medium and then incubated for 20 h at 20 °C after

103 induction.

104 *E. coli* mutants from the KEIO collection were used for construction of double deletion strains

105 and analysis of the periplasmic redox state (Baba et al., 2006). For expression of the redox

106 probes, mutant strains (Suppl. Table 1) harboring roGFP-based sensor protein-coding

107 plasmids (pPT\_rogFP2 or pPT\_rogFP-iL, Supplementary table S2) were cultivated in

108 MOPS minimal medium (Technova, Hollister, CA, USA) at 37 °C until an optical density

109 (OD) of ~0.5–0.8 was reached. Sensor protein expression was induced with 0.2 mM IPTG

110 and cells were cultivated for 16 h at 20 °C.

111 *Construction of different roGFP and DsbA expression vectors*

112 For construction of the pPT plasmid enabling periplasmic targeting, the *torA* sequence was

113 PCR amplified using appropriate primers (Supplementary table S3) from genomic *E. coli*

114 DNA (strain MC4100) and cloned into the pCC plasmid (Nilewski et al., 2021) using the

115 introduced *NdeI* 3' and 5' restriction sites. The *NdeI* restriction site upstream of *torA* was then

116 removed by QuickChange mutagenesis (Agilent, Waldbronn, Germany) according to the

117 manufacturer's protocol using primers QC-*NdeI*-fw and QC-*NdeI*-rv (Supplementary table  
118 S3) resulting in the pPT plasmid.

119 In order to target roGFP2 into the periplasm, *roGFP2* was PCR amplified using the primer  
120 pair listed in supplementary table S3 from the pCC-*roGFP2* plasmid as template. The  
121 introduced *NdeI* and *EcoRI* restriction sites were used to clone the gene into the pPT-plasmid  
122 resulting in pPT-*roGFP2* coding for a TorA-roGFP2 fusion protein.

123 The *roGFP-iL* gene was purchased from Addgene (Watertown, MA, USA) in a pQE30  
124 plasmid harboring an ampicillin resistance gene. The *roGFP-iL* gene was PCR amplified  
125 (Primers are listed in Supplementary table S3) with simultaneous introduction of *XhoI* and  
126 *EcoRI* restriction sites. The amplified gene was cloned into the pPT plasmid using the  
127 introduced restriction sites resulting in the plasmid pPT-*roGFP-iL* (pLK9).

128 For expression of a roGFP2-*EcDsbA*( $\Delta$ SP) fusion protein, a truncated variant of the *dsbA*  
129 ( $\Delta$ *nt1-48*) gene was PCR amplified lacking the periplasmic sequence ( $\Delta$ SP). The PCR  
130 fragment was cut with *EcoRI* and *HindIII*. AtPrxA- $\Delta$ CP was removed from the  
131 p416TEF-roGFP2-AtPrxA- $\Delta$ CP (Zimmermann et al., 2021) plasmid by the same restriction  
132 enzymes and *EcDsbA*( $\Delta$ SP) was cloned into the plasmid backbone, resulting in the plasmid  
133 pLK16.

#### 134 *Construction of E. coli dsbA, gshA double deletion strain by P1 transduction*

135 For the construction of an *E. coli gshA, dsbA* double mutant, the kanamycin cassette was  
136 removed from the *gshA* KEIO mutant using the plasmid 709-FLPE as indicated by the  
137 supplier (Gene Bridges, Heidelberg, Germany). Removal of the kanamycin cassette was  
138 verified by colony PCR using *k1*, *k2* and *gshA* primers listed in supplementary table S3. The  
139 *dsbA* mutant from the KEIO collection (strain: JW3832) was used as P1 donor. P1  
140 transduction was carried out as previously described (Thomason et al., 2007). Correct

141 insertion of *dsbA* deletion in marker free *ΔgshA* was checked using appropriate primers  
142 (Supplementary table S3).

### 143 *Periplasmic roGFP2-based measurements in E. coli*

144 For determining the roGFP2 redox state in different *E. coli* WT, *ΔdsbA*, *ΔgshA* or  
145 *ΔdsbAΔgshA*, the cells were transformed with the pPT\_roGFP2 plasmid encoding the  
146 TorA(SP)-roGFP2 fusion construct. Correct periplasmic probe localization was verified by  
147 fluorescence microscopy (Supplementary figure 1). After expression of roGFP2 for 16 h at  
148 20 °C, as aforementioned, cells were harvested, washed in HEPES buffer (40 mM, pH 7.4)  
149 and adjusted to an OD<sub>600</sub> of 1.0 in HEPES buffer containing either 1 mM Aldrithriol-2  
150 (Sigma-Aldrich, Darmstadt, Germany, CAS-2127-03-9, AT-2) (oxidation control), 10 mM  
151 Dithiothreitol (Sigma-Aldrich, Darmstadt, Germany, CAS-3483-12-3, DTT) (reduction  
152 control), or buffer. As AT-2 was solved in DMSO, the solvent was added to all samples.  
153 100 μL of the *E. coli* suspensions were added to the wells of a black, clear-bottom 96-well  
154 plate (Nunc, Rochester, NY). Fluorescence intensities were recorded using the Synergy H1  
155 multi-detection microplate reader (Biotek, Bad Friedrichshall, Germany) at excitation  
156 wavelengths 405 and 488 nm and emission wavelength at 525 nm at 25 °C. The ratios of the  
157 fluorescence excitation intensities (405/488 nm) were used to calculate the probe's oxidation  
158 state. All values were normalized to fully oxidized (AT-2-treated) and fully reduced (DTT-  
159 treated) roGFP2 with the following equation [1]:

$$OxD = \frac{R - R_{red}}{\left(\frac{I_{488ox}}{I_{488red}}\right) * (R_{ox} - R) + (R - R_{red})}$$

160 with  $R_{ox}$  being the 405/488 ratio of oxidized (AT2-treated) and  $R_{red}$  of reduced (DTT-treated)  
161 roGFP2 respectively.  $I_{488ox}$  and  $I_{488red}$  are the fluorescence intensities of roGFP2 at 488 nm  
162 under oxidizing or reducing conditions.  $R$  is the measured 405/488 nm ratio of roGFP2 in the  
163 respective bacterial strain under the respective condition.



164 For determining the re-oxidation capacity of roGFP2 in the periplasm of different *E. coli*  
165 mutants after a reductive pulse, cells expressing roGFP2 were harvested, washed in HEPES  
166 buffer and adjusted to an OD<sub>600</sub> of 1.0 in HEPES buffer. Afterwards aliquots of the cell  
167 suspension were treated with 10 mM DTT for 10 min at 25°C and the reductant was washed  
168 out by three washing steps with HEPES buffer. The OD<sub>600</sub> was again adjusted to 1.0 in  
169 HEPES buffer. After transfer of 100 µL of the respective cell suspensions into a black, clear-  
170 bottom 96-well plate (Nunc, Rochester, NY), 5 mM of the substances of interest: buffer,  
171 reduced (Sigma-Aldrich, CAS-70-18-8, GSH) or oxidized (Sigma-Aldrich, CAS-27025-41-8,  
172 GSSG) glutathione, cysteine or cystine, β-mercapthoethanol or DTT were added.  
173 Fluorescence intensities were recorded as described above with 1 min 41 sec intervals for  
174 180 min at 25 °C. Fully oxidized (AT-2-treated), fully reduced (DTT-treated) and untreated  
175 cells, that were not pre-reduced were used to calibrate roGFP2. For calculation and  
176 normalization of the probe's oxidation degree at each time point, the means of all values  
177 recorded at all time points for  $R_{red}$ ,  $R_{ox}$ ,  $I_{488ox}$  and  $I_{488red}$  were used. Data was processed  
178 using Microsoft Excel software and GraphPad Prism.

#### 179 *Determination of the redox potential of roGFP-iL in the periplasm of E. coli*

180 The redox potential of roGFP-iL targeted to the periplasm of *E. coli* WT,  $\Delta dsbA$ ,  $\Delta gshA$  or  
181  $\Delta dsbA\Delta gshA$  by expression from pPT-roGFP-iL plasmid was determined as described  
182 previously for cytosolic roGFP2 (Degrossoli et al., 2018; Gutscher et al., 2008; Xie et al.,  
183 2020) or Grx1-roGFP2-iL located in the endoplasmic reticulum (Ugalde et al., 2022). Correct  
184 probe localization was verified by fluorescence microscopy (Supplementary figure 1). Firstly,  
185 roGFP-iL was expressed as described above for 16 h at 20 °C, cells were harvested, washed  
186 in HEPES buffer (40 mM, pH 7.4) and adjusted to an OD<sub>600</sub> of 1.0 in HEPES buffer. The  
187 fluorescence intensity was recorded with continuous stirring every 30 sec for at least 5 min at  
188 37 °C in an FP-8500 spectrofluorometer (Jasco, Tokyo, Japan) with a fixed emission

189 wavelength at 510 nm. The scanned excitation wavelength ranged from 350 to 500 nm.  
190 Bandwidths of both, excitation and emission were set to 5 nm. The fluorescence excitation  
191 ratios (395/465 nm) were used as measurement of probe oxidation (Lohman and Remington,  
192 2008). For normalization, 1 mM AT-2 and 10 mM DTT were added to the cells achieving full  
193 oxidation or reduction of the probe. For calculation, equation [1] was modified.  $R_{ox}$  was  
194 395/465 ratio of oxidized and  $R_{red}$  of reduced roGFP-iL.  $I_{465ox}$  and  $I_{465red}$  represent the  
195 fluorescence intensities of roGFP2 at 465 nm under oxidizing or reducing conditions.  $R$  is  
196 the measured 395/465 nm ratio of roGFP-iL in the respective bacterial strain under the  
197 respective conditions. All values used for calculation of  $R_{ox}$ ,  $R_{red}$ ,  $I_{465ox}$  and  $I_{465red}$  are the  
198 mean of at least four measured time points, respectively.  
199 The redox potential of roGFP-iL in the periplasm was calculated as previously described  
200 (Ugalde et al., 2022; Xie et al., 2020) using the Nernst equation [2]:

$$E_{roGFPiL} = E_{roGFPiL}^0 - \frac{R * T}{n * F} * \ln \left( \frac{1 - OxD_{roGFPiL}}{OxD_{roGFPiL}} \right)$$

201 with  $E_{roGFPiL}^0 = -229$  mV (Lohman and Remington, 2008).  $R$  is the gas constant  
202 (8.314 J.K<sup>-1</sup>.mol<sup>-1</sup>),  $T$  (310.15 K  $\equiv$  25 °C),  $n$  is the number of transferred electrons (2) and  $F$  is  
203 Faraday's constant (96'485 C mol<sup>-1</sup>). Data was processed using Microsoft Excel software and  
204 GraphPad Prism.

## 205 *Fluorescence Microscopy*

206 *E. coli* WT,  $\Delta dsbA$ ,  $\Delta gshA$  or  $\Delta dsbA \Delta gshA$  cells producing either roGFP2 or roGFP-iL from  
207 pPT plasmids cultivated as described above were harvested, washed and resuspended to an  
208 OD<sub>600</sub> of 1.0 in PBS buffer (1.5 mM KH<sub>2</sub>PO<sub>4</sub>, NaCl 150 mM, 2.7 mM Na<sub>2</sub>HPO<sub>4</sub>-7xH<sub>2</sub>O, pH  
209 7.4). Afterwards, 2  $\mu$ L of the cell suspension were spotted on a 1.5 % Agarose pad covering a  
210 microscopy slide. *E. coli* WT cells producing roGFP2 from the pCC-roGFP2 plasmid served  
211 as cytoplasmic control. For fluorescence microscopy and image acquisition an Olympus

212 BX51 microscope equipped with CCD camera (Retiga 3, QImaging), and LED light source  
213 (SOLA-365, Lumencor) driven by VisiView 3.× (Visitron systems) software was used. Image  
214 acquiring was carried out using a Plan-APO 100×/1.4 NA oil objective with the following  
215 filter set: BP 450–488 nm, FT 495 nm, and BP 512–542 nm. The Image J software (Schneider  
216 et al., 2012) was used for image processing.

#### 217 *Intracellular roGFP2-based measurements in yeast cells*

218 YPH499  $\Delta glr1\Delta grx1\Delta grx2$  cells were transformed with a p415TEF-*OPT1* plasmid encoding  
219 the glutathione transporter, Opt1/Hgt1, and a p416TEF plasmid encoding the indicated  
220 roGFP2 fusion construct. Cells transformed with empty plasmids served as controls for the  
221 subtraction of fluorescence background. Cells were grown at 30°C in Hartwell’s complete  
222 (HC) medium with 2% glucose and lacking leucine and uracil (-Leu-Ura) to ensure retention  
223 of both plasmids to an  $OD_{600}$  of ~3.0. Cells were harvested by centrifugation at 1000 x g for  
224 3 min at room temperature and resuspended in 2 mL fresh HC -Ura-Leu medium containing  
225 50 mM DTT to reduce all roGFP2 sensors before the start of the experiment. Cells were then  
226 incubated for 4 min at room temperature, centrifuged at 1000 x g for 3 min, washed once with  
227 2 mL fresh HC -Ura-Leu medium and finally resuspended in fresh HC -Ura-Leu medium to  
228 an  $OD_{600}$  of 7.5. The cell suspension was subsequently transferred to a flat-bottomed 96-well  
229 plate, with 200  $\mu$ l per well. The 96-well plate was centrifuged at 30 x g for 5 min so that cells  
230 formed an even, loose pellet at the bottom of each well.

231 To calibrate the probe, fully oxidized and fully reduced samples were generated by the  
232 addition of 20 mM *N,N,N,N'*-Tetramethylazodicarboxamide (diamide, *Sigma Aldrich*) or  
233 100 mM Dithiothreitol (DTT, *AppliChem*), respectively. Glutathione disulfide (GSSG, *Sigma*  
234 *Aldrich*) was added to experimental samples at final concentrations ranging from 1.5  $\mu$ M to  
235 100  $\mu$ M. Probe responses were followed for 500 s in a BMG Labtech CLARIOstar<sup>Plus</sup>  
236 fluorescence plate reader. All experiments were performed at least three times with cells from

237 independent cultures. The degree of roGFP2 oxidation was calculated according to equation  
238 [1] with the exception that values were recorded at 400 and 480 nm instead of 405 and  
239 488 nm.

#### 240 *Purification of DsbA $\Delta$ SP and roGFP2 from E. coli BL21 and enzymatic assay*

241 For DsbA *in vitro* assays, DsbA was expressed as N-terminally truncated variant lacking the  
242 periplasmic signal peptide and N-terminally fused to a Strep-Tag with a TEV-cleavage site in  
243 *E. coli* BL21 cells. The protein was purified with Strep-affinity chromatography (for more  
244 details see supplementary figure 2), the tag was removed by TEV-cleavage and the protein  
245 was dialyzed into buffer W (100 mM Tris-HCl, 150 mM NaCl, 1 mM EDTA, pH 8.0).  
246 roGFP2 was expressed from pCC\_*roGFP2* in *E. coli* MG1655 and purified as previously  
247 described (Müller et al., 2017). DsbA $\Delta$ SP was oxidized with a 10-fold molar excess of AT-2  
248 and roGFP2 was reduced with a 10-fold molar excess of DTT for 10 min at 20 °C and then  
249 the oxidant or reductant were removed using Micro Bio-Spin™ P-30 gel columns (BioRad,  
250 Feldkirchen, Germany, #7326223) or NAP™-5 columns (Cytiva, Freiburg, Germany,  
251 #17085302) according to the supplier's protocol. For kinetic measurements, 0.2  $\mu$ M roGFP2  
252 were incubated with buffer alone, a 20-fold molar excess of oxidized DsbA $\Delta$ SP, GSSG or  
253 both in a 96-well plate (Nunc, Rochester, NY). Addition of 2  $\mu$ M AT-2 or DTT served as  
254 calibration marks for fully reduced or oxidized roGFP2 for the calculation of the OxD,  
255 according to equation [1]. roGFP2 fluorescence was recorded for 18 h at 25 °C in a Synergy  
256 H1 multi-detection microplate reader (Biotek, Bad Friedrichshall, Germany) at the excitation  
257 wavelengths 405 and 488 nm and emission wavelength at 525 nm with the following settings:  
258 20 nm bandwidth, gain 75 %, intervals: 1 min 41 sec, optics: bottom. Data processing was  
259 carried out as described above for cellular roGFP2 assays.

260 *PhoA activity assay and verification of PhoA synthesis*

261 Activity of alkaline phosphatase PhoA was measured as described previously (Brickman and  
262 Beckwith, 1975) with modifications. Briefly, mutant strains were cultivated in 5 mL MOPS  
263 minimal medium with appropriate antibiotics at 37 °C without or with supplementation of 5  
264 mM GSH or GSSG for around 18 h. Afterwards, *A. dest.*, 5 mM GSH or GSSG were added  
265 again and the cells were incubated for one more hour. After incubation and measurement of  
266 the OD<sub>600</sub>, 100 mM iodoacetamide (Sigma-Aldrich, CAS-144-48-9, IAM) was added to 1 mL  
267 of the culture and cells were left on ice for 20 min. Cells were harvested (16,000 x g, 4 °C, 2  
268 min) and washed two times with 1 mL washing buffer (50 mM NaCl, 10 mM NH<sub>4</sub>Cl, 10 mM  
269 MgCl<sub>2</sub>, 40 mM MOPS, 10 mM IAM, pH 7.3). Cell pellets were resuspended in 100 µL lysis  
270 buffer (10 mM EDTA, 2 mg/mL lysozyme, 20 mM Tris-HCl, 10 mM IAM, pH 8.0) and  
271 incubated for 30 min on ice. Afterwards, cells were lysed by three freeze and thaw cycles in  
272 liquid nitrogen and a 37 °C waterbath, followed by addition of 900 µL resuspension buffer  
273 (10 mM MgCl<sub>2</sub>, 10 mM ZnCl<sub>2</sub>, 1 M Tris-HCl, pH 8.0) and warming the samples to 28 °C.  
274 0.04 % *p*-nitrophenylphosphate (Sigma-Aldrich, CAS- 333338-18-4) were added and samples  
275 were incubated until the solution turned visibly yellow, before the reaction was stopped by  
276 adding 200 µL 1 M K<sub>2</sub>HPO<sub>4</sub>. The time point of reaction stop was noted. Lysates were then  
277 incubated on ice for 10 min and centrifuged for 5 min at 16,000 x g. The absorption at 420 nm  
278 and 550 nm of the supernatant was measured against a mixture of 100 µL lysis buffer, 900 µL  
279 resuspension buffer, 100 µL 0.4 % pNPP solution and 200 µL stop solution in a  
280 BioSpectrophotometer (Eppendorf, Hamburg, Germany). The PhoA activity was calculated  
281 using equation [3]:

$$AU = 1000 * \frac{Abs_{420} - 1.75 * Abs_{550}}{Time [min] * OD_{600}} * Dilution\ factor$$

282 with AU being arbitrary units, Abs being the absorption at 420 nm and 550 nm and OD<sub>600</sub>  
283 being the culture optical density at 600 nm.

284 For analysis of PhoA accumulation, 1 mL of each aforementioned cultures were harvested  
285 and the pellet was resuspended in standard 1x SDS-sample buffer adjusted to 100  $\mu$ L for an  
286 OD<sub>600</sub> of 1.0. PhoA accumulation was analyzed by SDS-PAGE (NuPAGE™ 4 bis 12 %, Bis-  
287 Tris, Invitrogen, Waltham, MA, USA) and Western blot analyses were carried out using  
288 nitrocellulose membranes in the iBLOT2 system (Invitrogen, Waltham, MA, USA), both  
289 according to the supplier. For detection on Western blot, a PhoA-specific first antibody  
290 (Sigma-Aldrich, #MAB1012 1:5'000) and a goat-anti-mouse IRDye 800CW conjugate  
291 (LeiCor, Lincoln, NE, USA, #926-32210) were used (1:5'000) according to the supplier's  
292 protocol. Proteins were detected by fluorescence using the Sapphire Azure Multiimager  
293 (Azure biosystems, Dublin, CA, USA).

#### 294 *Analysis of E. coli growth*

295 *E. coli* mutant strains were cultivated in 750  $\mu$ L MOPS minimal medium in a transparent 48-  
296 well plate (Sarstedt, Nümbrecht, Germany) without or with supplementation of 5 mM GSH or  
297 GSSG at 37 °C with continuous shaking in an infinite M200 multiplate reader (Tecan  
298 instruments, Männedorf, Switzerland). Cells were inoculated to a starting OD<sub>600</sub> of 0.1 and  
299 bacterial growth was recorded every 30 min for 18 h.

300 **Results:**

301 *roGFP2 is completely oxidized in the E. coli periplasm, even in the absence of the major*  
302 *oxidase DsbA*

303 The redox state of cellular compartments is often assessed by targeting genetically encoded  
304 redox probes to the compartment of interest. One frequently used redox sensor is roGFP2, a  
305 GFP variant, in which two cysteines were introduced at positions 147 and 204 that can form a  
306 disulfide bond upon oxidation. This disulfide bond results in a shift in the fluorescence  
307 excitation spectrum of the probe, in which the excitation maximum at 488 nm is reversibly  
308 decreased with a simultaneous increase of the excitation peak at 405 nm. Excitation at either  
309 maxima results in emission at ~510 nm. The ratio of the fluorescence emission intensity upon  
310 excitation at 405 nm and 488 nm reflects changes in the dithiol disulfide state of the probe  
311 and, in combination with fully oxidized and reduced controls, allows the determination of the  
312 degree of the probe oxidation independent of probe concentration (Degrossoli et al., 2018;  
313 Dooley et al., 2004; Lukyanov and Belousov, 2014; Meyer and Dick, 2010; Xie et al., 2020).  
314 In order to assess the periplasmic oxidation state of *E. coli*, we targeted roGFP2 to this  
315 compartment. GFP is usually not folding correctly in the periplasm, hence the general  
316 secretory pathway (Sec) is unsuitable for targeting roGFP2 to the periplasm (Santini et al.,  
317 2001). In contrast, *E. coli*'s twin-arginine translocase (or Tat system) transports completely  
318 folded substrates over the inner membrane. Tat-translocation requires the presence of an N-  
319 terminal signal peptide, characterized by an essential twin-arginine motif (Palmer and Berks,  
320 2012; Thomas et al., 2001). To target roGFP2 to the periplasm via the Tat system, we  
321 expressed the protein as an N-terminal torA<sub>SS</sub> fusion in the KEIO wildtype *E. coli* BW25113  
322 (referred to as WT) (Baba et al., 2006) (Fig. 1A). We verified translocation of roGFP2 into  
323 the periplasm using fluorescence microscopy (Fig. 1B, left panel). Determination of the  
324 roGFP2 oxidation state (OxD) revealed complete oxidation of the probe in the periplasm of

325 *E. coli* WT (Fig. 1C, left panel). As the DsbA/DsbB pair is the major system for oxidative  
326 protein folding in the periplasm of *E. coli* (Collet and Bardwell, 2002), roGFP2 was also  
327 targeted to the periplasm of cells lacking DsbA (Fig. 1B, right panel). Surprisingly however,  
328 periplasmic roGFP2 was still fully oxidized in the absence of DsbA (Fig. 1C, right panel),  
329 suggesting the presence of an alternative mechanism for the introduction of disulfide bonds in  
330 this compartment. In both cases, due to the complete oxidation of the probe, we were not able  
331 to determine the redox potential for the roGFP2 dithiol disulfide couple.

332 *The redox-potential of the periplasm is significantly more reducing in cells lacking DsbA*

333 In order to determine the periplasmic redox potential exerted on proteins containing cysteines,  
334 we turned to roGFP variants with a more oxidizing standard redox potential (Lohman and  
335 Remington, 2008). These probes, termed roGFP-iX were developed by insertion of a single  
336 amino acid (denoted by the 'X') adjacent to cysteine 147 resulting in a decreased stability of  
337 the disulfide bond and midpoint potentials of  $-229$  to  $-246$  mV compared to  $-280$  mV of  
338 roGFP2. These roGFP-iX variants have been successfully used to monitor the oxidation state  
339 of the endoplasmic reticulum, a highly oxidized compartment in eukaryotic cells and a major  
340 site of oxidative protein folding (Delic et al., 2010; Dooley et al., 2004; Ugalde et al., 2022).  
341 Thus, roGFP-iL with a midpoint potential of  $-229$  mV was expressed and targeted to the  
342 periplasm of the WT and  $\Delta dsbA$  strain (Fig. 1A, B, right panel). In contrast to roGFP2,  
343 roGFP-iL was only around 50 % oxidized in the WT periplasm (Fig. 1B, left panel), allowing  
344 the calculation of the redox-potential using the Nernst equation as described before (Xie et al.,  
345 2020). In the WT the redox-potential of roGFP-iL in the periplasm was  $-228$  mV (Fig. 1E,  
346 left panel). Not surprisingly, the lack of DsbA resulted in a more reduced roGFP-iL probe  
347 (Fig. 1E, right panel). The shift in the redox-potential was around 14 mV to  $-243$  mV,  
348 supporting the role of DsbA in oxidative protein folding, however, the relatively small size of



349 the shift suggests the presence of an alternative mechanism for the introduction of disulfide  
 350 bonds.  
 351 *Periplasmic thiol oxidation is significantly impaired but not abrogated in a  $\Delta dsbA$ -mutant*  
 352 Our experiments with roGFP2 and roGFP-iL reflected the steady state of thiol oxidation in the  
 353 periplasm. However, both stress and physiological situations are often accompanied by  
 354 increased protein secretion, requiring correct oxidative protein folding and hence, may affect  
 355 the redox homeostasis of the periplasm. In order to test the capacity of the periplasm to restore  
 356 its redox balance after reductive challenge, we evaluated the re-oxidation kinetics of

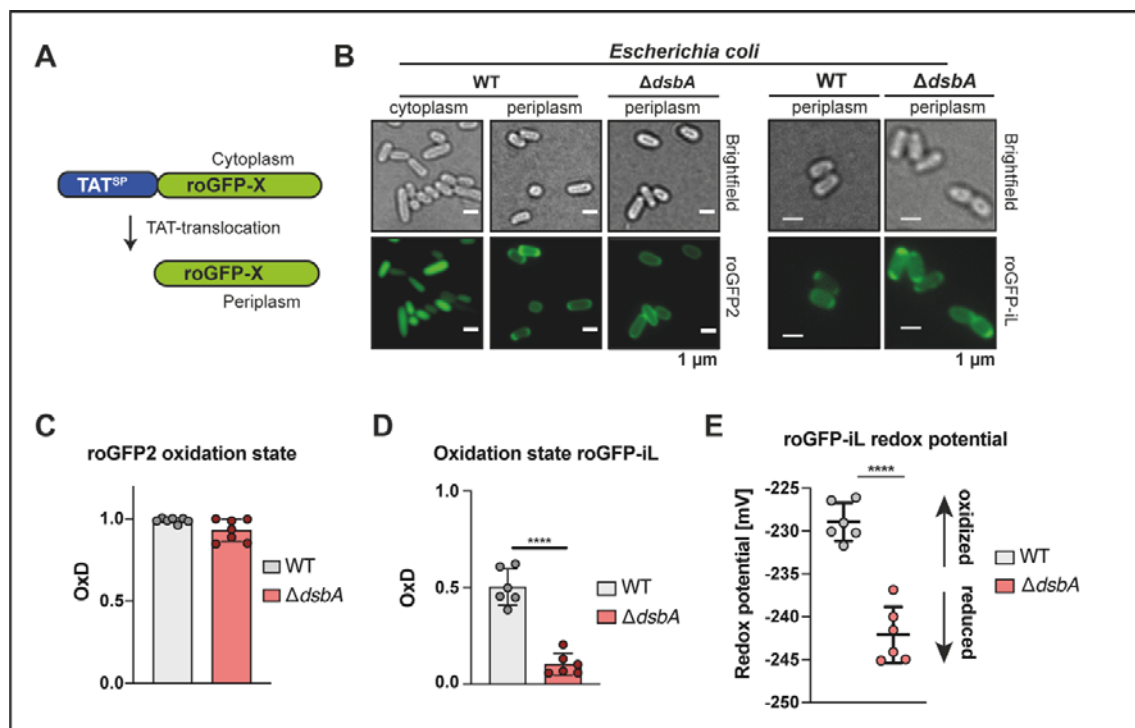

357

358 **Figure 1. Genetically encoded redox probes reveal the redox potential imposed onto thiol pairs the**  
 359 **periplasm of *E. coli*.** (A) Schematic depiction of the targeting of both roGFP probes to the periplasm by N-  
 360 terminal fusion with the torA signal sequence. (B) Correct localization of roGFP2 (left) and roGFP-iL  
 361 (right) is confirmed by fluorescence microscopy. (C) Oxidation state (OxD) of roGFP2 in the periplasm of  
 362 WT and cells lacking DsbA. The emission at 525 nm was recorded after excitation of roGFP2 at 488 nm  
 363 and 405 nm in *E. coli* WT or cells lacking DsbA. OxD was determined based on samples reduced with  
 364 DTT and oxidized with Aldrithiol-2 (AT-2). Each value represents the mean of three technical replicates.  
 365 Error bars represent the standard deviation in n=7 individual replicates. (D) Oxidation state (OxD) of  
 366 roGFP-iL in the periplasm of WT and of cells lacking DsbA. roGFP-iL emission at 525 nm was recorded  
 367 after excitation at 395 nm or 465 nm in *E. coli* WT or  $\Delta dsbA$ . (E) The roGFP-iL redox potential was  
 368 calculated using the Nernst equation. Values were recorded in independent measurements and error bars  
 369 represent the standard deviation in n=6 individual replicates. Significance tests in B and C were performed  
 370 using Student's t-test \*\*\*\* $p < 0.0001$ .

371 periplasmic roGFP2 after a reductive pulse. To explore the role of DsbA in this process, we  
372 also analyzed the re-oxidation of roGFP2 in cells lacking this oxidoreductase. In these  
373 experiments, we treated WT and cells lacking DsbA cells, both expressing roGFP2 in the  
374 periplasm with a pulse of DTT. This was followed by the removal of the reductant and the  
375 recording of the oxidation state of roGFP2 over time (Fig. 2A). In the WT, periplasmic  
376 roGFP2 oxidation starts immediately after DTT removal and restores maximum oxidation  
377 within 150 min. Cells that lack DsbA also showed sensor re-oxidation, however, roGFP2 was  
378 not restored to maximum oxidation in the time frame of our measurement (Fig. 2B).  
379 Additionally, the re-oxidation rate, calculated as the linear slope after DTT removal, was  
380 significantly lower in DsbA-deficient cells, however, there was still re-oxidation capacity  
381 present (Fig. 2C). These findings suggest that there is an additional factor playing a role in  
382 periplasmic redox homeostasis, other than DsbA. To further explore our hypothesis, we used  
383 cell lysates derived from *E. coli* WT and DsbA-deficient cells and explored their capacity to  
384 re-oxidize DTT-reduced, purified roGFP2 (Fig. 2D). Similar to the cell re-oxidation assay, we  
385 calculated the oxidation rate from the linear slope within the first two hours of measurement.  
386 Although roGFP2 oxidation by cell lysate was slow, when compared to intact cells, lysate  
387 from WT was significantly faster in catalyzing roGFP2 re-oxidation than a  $\Delta dsbA$  lysate.  
388 However, in line with our previous findings, indicating another factor capable of catalyzing  
389 disulfide bond formation in the periplasm, the  $\Delta dsbA$  lysate was still significantly faster than a  
390 buffer control (Fig. 2E, F). The rather slow oxidation of roGFP2 *in vitro* may be explained by  
391 the fact that DsbA preferably introduces disulfide bonds in unfolded proteins entering the  
392 periplasm over folded ones (Kadokura et al., 2004).

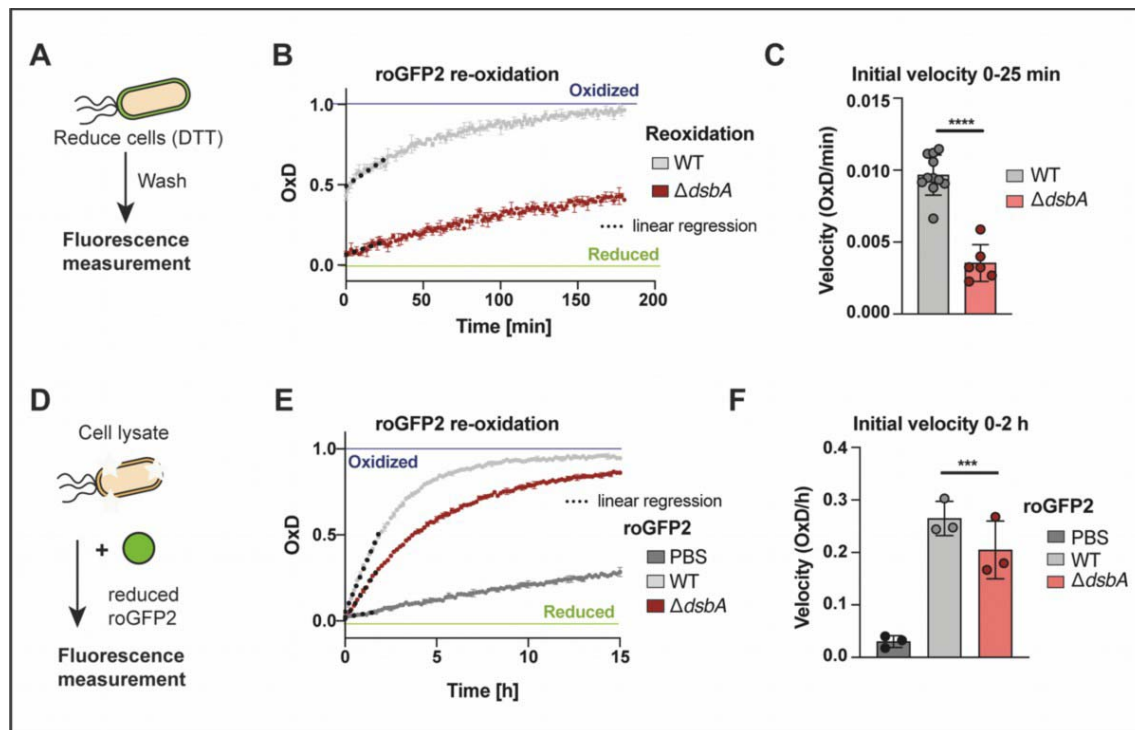

393

394 **Figure 2. Lack of the oxidase DsbA results in inhibited re-oxidation of roGFP2 in vivo and in vitro.**  
 395 (A) Schematic representation of the workflow of *in vivo* re-oxidation kinetics in the periplasm. (B) Re-  
 396 oxidation of roGFP2 in the periplasm of *E. coli*. *E. coli* WT and  $\Delta dsbA$ , expressing periplasmic roGFP2  
 397 were reduced with 10 mM DTT. The reductant was washed out and fluorescence intensities were recorded.  
 398 DTT-reduced and AT-2-oxidized cells served as controls for calculation of OxD. One representative  
 399 example out of at least six individual replicates is shown. Error bars represent standard deviation of the  
 400 technical triplicates of that individual experiment. (C) For an estimation of the initial re-oxidation velocity,  
 401 a linear regression was calculated for the first 25 min after start of the measurement (dashed lines in B).  
 402 Values shown as circles are the mean of three technical repeats recorded in at least six independent  
 403 experiments. Error bars reflect the standard deviation of the means. (D) Schematic representation of the  
 404 workflow of *in vitro* re-oxidation kinetics using *E. coli* lysate. (E) Oxidation of purified roGFP2 by *E. coli*  
 405 lysates. Purified roGFP2 was reduced with DTT, the reductant was removed and *E. coli* cell lysates of WT  
 406 or  $\Delta dsbA$  were added (10  $\mu$ g of protein). One representative experiment is shown. Values displayed are the  
 407 mean of three technical replicates. Error bars reflect the standard deviation. Note the different time scales in  
 408 (B) and (E). (F) The initial re-oxidation velocity was calculated from a linear regression in the first 2 hours  
 409 from the start of the measurement (dashed lines in E). Values (circles) are the mean of three technical  
 410 replicates recorded in 3 independent measurements. Error bars reflect the standard deviation of the means.  
 411 Significance tests in (C) were performed using Student's t-test and (F) using one way ANOVA. \*\*\* $p <$   
 412 0.001; \*\*\*\* $p <$  0.0001.

413 *Oxidized glutathione rescues periplasmic roGFP2 re-oxidation velocity in cells lacking DsbA*

414 Based on our observations, we suspected that glutathione (GSH) and its oxidized dimer GSSG  
 415 might influence the periplasmic redox balance in *E. coli* and thus might act as part of an  
 416 auxiliary system in oxidative folding. Glutathione is one of the most important redox-active

417 molecules inside many cells and it has been shown to be present in the periplasm (Eser et al.,  
418 2009; Pittman et al., 2005).

419 We thus analyzed the periplasmic capacity for re-oxidizing roGFP2 in the presence of  
420 glutathione after a reductive pulse. *E. coli* WT and DsbA-deficient cells producing  
421 periplasmic roGFP2 were thus reduced with DTT, and, after reductant removal, roGFP2  
422 oxidation was recorded in the presence of 5 mM GSH or GSSG (Fig. 3A). Surprisingly,  
423 addition of GSH to WT cells resulted in an accelerated roGFP2 re-oxidation in the periplasm,  
424 whereas GSSG supplementation had no discernible influence (Fig. 3B). In contrast, in cells  
425 that lack DsbA, GSH and GSSG acted in a more expected way; while GSSG supplementation  
426 rescued roGFP2 re-oxidation, GSH had no influence on the periplasmic redox dynamics in  
427  $\Delta dsbA$  (Fig. 3C). Calculation of the re-oxidation rate confirmed that while GSH significantly  
428 speeds up re-oxidation of periplasmic roGFP2 in the WT, GSSG significantly accelerates the  
429 re-oxidation rate of roGFP2 in DsbA-deficient cells, essentially to WT level (Fig. 3D). Based  
430 on these findings, we asked ourselves if DsbA is interacting with glutathione, causing the  
431 observed opposite responses to GSH and GSSG in WT and DsbA-deficient *E. coli* cells.

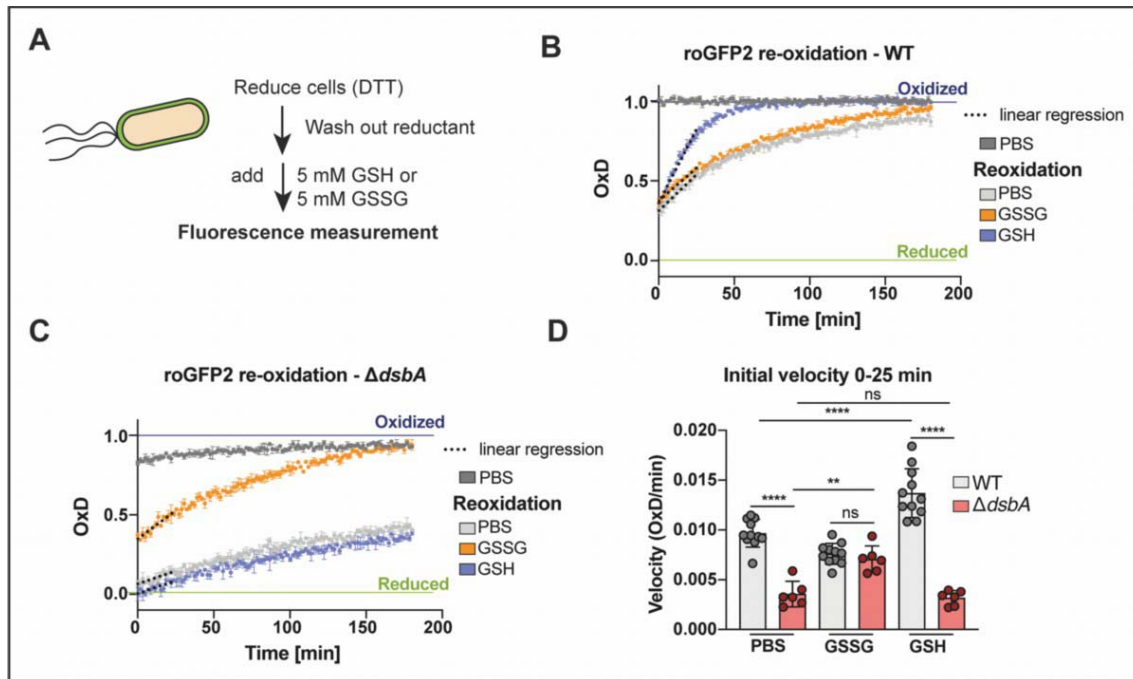

432

433 **Figure 3. External addition of oxidized glutathione rescues the re-oxidation of roGFP2 in the**  
434 **periplasm of cells lacking DsbA, while reduced glutathione accelerates re-oxidation of roGFP2 in the**  
435 **periplasm of *E. coli* WT. (A)** Schematic representation of the workflow of *in vivo* re-oxidation kinetics in  
436 the periplasm. *E. coli* WT **(B)** and  $\Delta dsbA$  **(C)** expressing periplasmic roGFP2 were reduced with 10 mM  
437 DTT. The reductant was washed out, 5 mM GSH or GSSG were added and fluorescence intensities were  
438 recorded. DTT-reduced and AT-2-oxidized cells served as controls for calculation of OxD. A  
439 representative experiment is shown. Values are the mean of three technical replicates. Error bars reflect the  
440 standard deviation. **(D)** The initial re-oxidation velocity was calculated as linear regression for the first 25  
441 min after start of the measurement (dashed lines in B and C). Values (circles) are the mean of three  
442 technical replicates recorded in a minimum of six experimentally independent replicates. Error bars  
443 represent the standard deviation. Values for PBS treated cells of the WT and  $\Delta dsbA$  are the same as shown  
444 in Fig. 2 and are presented here for context. Significance test was performed using one way ANOVA.  
445 ns>0.05, \*\*p<0.01, \*\*\*\*p < 0.0001.

446 *Oxidized glutathione does not directly interact with the oxidase DsbA*

447 To investigate if glutathione interacts with DsbA, we investigated the effect of GSSG on  
448 DsbA-dependent roGFP2 oxidation *in vitro*. Purified DsbA was oxidized and added to  
449 reduced roGFP2. Similar to the aforementioned lysate assay, the oxidation rate of roGFP2 by  
450 DsbA is rather slow compared to *in vivo* re-oxidation, although significantly higher compared  
451 to buffer alone (Fig. 4A, B). The oxidation rate of roGFP2 in the presence of GSSG alone was  
452 slightly slower, but still comparable to roGFP2 oxidation by DsbA. Adding both GSSG and

453 DsbA at the same time did not even double the probe's oxidation rate, indicating an additive  
454 effect of GSSG and DsbA and not a GSSG-driven catalytic action of DsbA.  
455 To further confirm the incapability of DsbA to perform GSSG-dependent roGFP2 oxidation,  
456 we used the cytosol of genetically manipulated yeast cells as “cellular test tubes”. This assay  
457 is performed in yeast cells, lacking the glutathione reductase (Glr1) and both cytosolic class I  
458 dithiol glutaredoxins (Grx1, Grx2), while simultaneously expressing Opt1, a glutathione  
459 transporter (Zimmermann et al., 2021). This *in vivo* system should enable us to monitor a  
460 potential DsbA-catalyzed oxidation of roGFP2 by GSSG in the absence of any *E. coli*-specific  
461 factors. For this, we engineered a roGFP2-DsbA fusion construct and expressed it in the  
462 cytosol of the  $\Delta glr\Delta grx1\Delta grx2$  yeast cells, following the exogenous application of GSSG  
463 concentrations between 1.5-100  $\mu$ M. Unfused roGFP2 served as negative and roGFP2 fused  
464 to *homo sapiens* glutaredoxin (roGFP2-HsGrx) as positive control for direct interaction with  
465 GSSG. In this assay, GSSG-driven roGFP2 oxidation did not depend on the oxidase DsbA  
466 (Fig. 4C, D). However, we cannot exclude that roGFP2 is an inappropriate substrate of DsbA  
467 in the fusion construct and therefore roGFP2 may not be oxidized by DsbA in this assay. In  
468 contrast, the roGFP2-HsGrx fusion probe strongly reacted to the addition of GSSG (Fig. 4E).  
469 Both the *in vitro* and the “cellular test tube” approach strongly suggest that DsbA does not  
470 interact with glutathione itself, indicating that the role of glutathione in the periplasmic redox  
471 homeostasis is independent of the known mechanism for disulfide bond formation in *E. coli*.

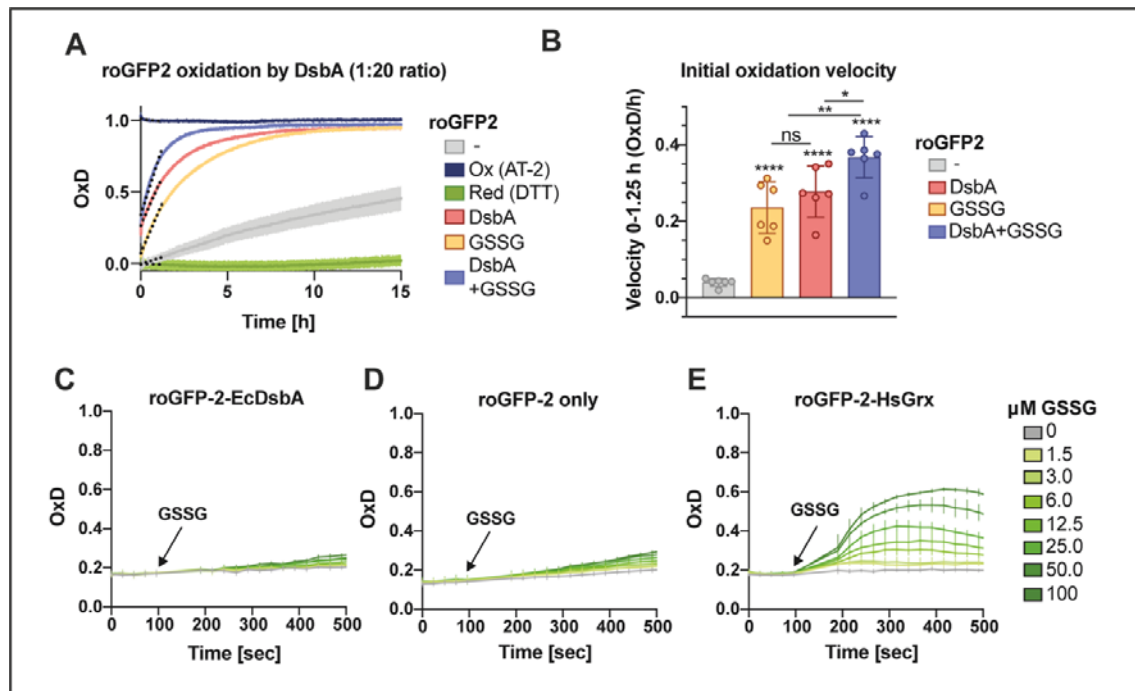

472

473 **Figure 4. Oxidation of roGFP2 by oxidized glutathione (GSSG) is not catalyzed by DsbA.** (A)  
 474 Oxidation of purified reduced roGFP2 by AT-2-oxidized DsbA (red), GSSG (orange) or both (purple).  
 475 Purified roGFP2 was reduced with DTT, the reductant was washed out and DsbA and/or GSSG were added  
 476 in a 20-fold molar excess. PBS was used to track air oxidation of roGFP2. DTT served as reduction and  
 477 AT-2 as oxidation controls for calculation of OxD. (B) The initial re-oxidation velocity was calculated as  
 478 linear regression for the first 1.25 hours after the start of measurement (dashed lines A). Values (circles) are  
 479 the mean of three technical replicates recorded in a minimum of six independent repeats and error bars  
 480 depict standard deviation. Significance test was performed using one-way ANOVA ns  $p > 0.05$  \* $p < 0.05$ ,  
 481 \*\* $p < 0.01$ , \*\*\* $p < 0.001$ , \*\*\*\* $p < 0.0001$ . (C) The oxidation state of the cytosolic roGFP2 fusion protein  
 482 roGFP2-EcDsbA was monitored in ScOpt1/ScHgt1 YPH449 *glr1 grx1 grx2* yeast cells upon exogenous  
 483 addition of different GSSG amounts. Unfused roGFP2 (D) served as negative and roGFP2-HsGrx1 (E)  
 484 as positive control for protein-GSSG interaction. Values (B-E) are the mean of four individual replicates and  
 485 error bars depict the standard deviation.

486 *Monothioles accelerate roGFP2 re-oxidation in a DsbA-dependent mechanism*

487 While we excluded the interaction of GSSG with DsbA, we showed that the addition of GSH  
 488 accelerated the re-oxidation rate of periplasmic roGFP2 after a reductive pulse in a DsbA-  
 489 dependent manner (Fig. 3B, D). To investigate whether this effect is limited to GSH, we  
 490 tested the influence of other reduced monothioles and dithioles. Cystein,  $\beta$ -mercaptoethanol,  
 491 and DTT were added to *E. coli* WT and  $\Delta dsbA$  cells and roGFP2 re-oxidation dynamics in the  
 492 periplasm were measured as described above. The addition of the monothioles cysteine and  $\beta$ -  
 493 mercaptoethanol to WT significantly accelerated roGFP2 oxidation similar to GSH, as

494 measured by the time after which the probe reached full oxidation. In contrast to monothiols,  
495 addition of the dithiol DTT to WT completely inhibited roGFP2 re-oxidation. We also  
496 included cystine in our assay, the oxidized form of the amino acid cysteine. In contrast to  
497 GSSG, which had no impact on the roGFP2 oxidation rate in WT, cystine massively reduced  
498 the time until full oxidation was reached (Fig. 5A, B). In the  $\Delta dsbA$  mutant, the presence of  
499 monothiols had no significant impact, while cystine supplementation caused a drastically  
500 increased re-oxidation state and rate, similar to WT (Fig. 5C, D). Overall, these findings  
501 suggest a DsbA-dependent effect of monothiols, accelerating thiol oxidation in the periplasm,  
502 even though we did not observe direct interaction of oxidized glutathione with DsbA itself.



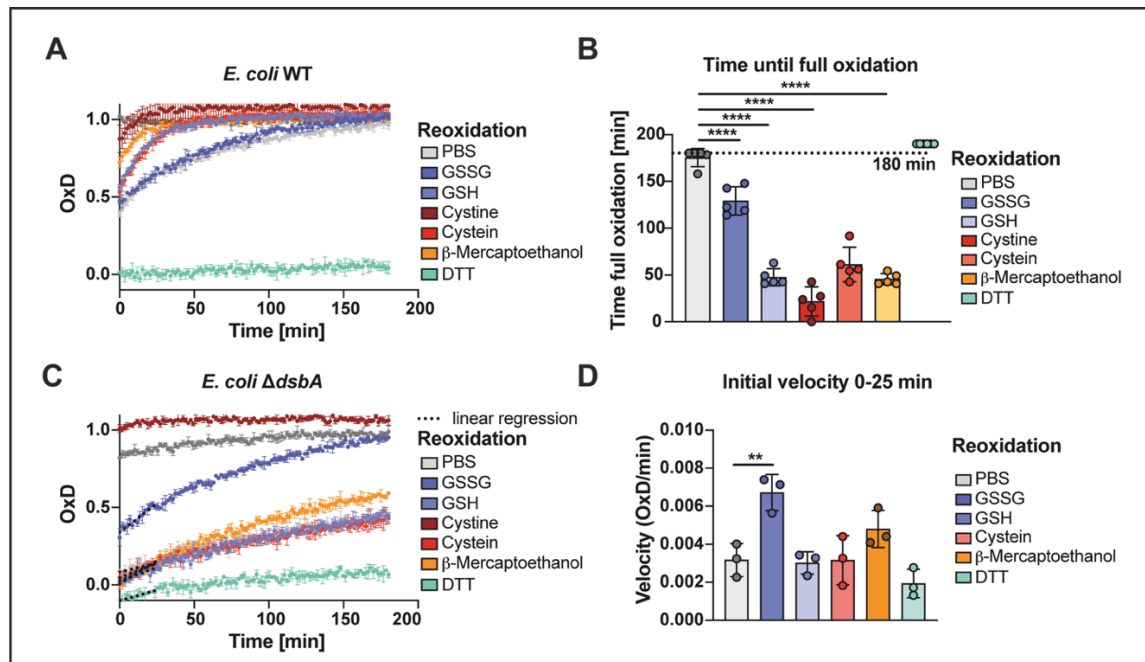

503

504 **Figure 5. The re-oxidation of periplasmic roGFP2 in *E. coli* WT is accelerated by external addition of**  
 505 **different monothiols. (A)** Influence of monothiols on the re-oxidation of roGFP2 in *E. coli* periplasm after  
 506 a reductive pulse. *E. coli* WT cells with roGFP2 in their periplasms were reduced with 10 mM DTT, before  
 507 the reductant was washed out and 5 mM GSH, GSSG, cysteine, cystine, DTT or β-mercaptoethanol were  
 508 added. Then, fluorescence intensities were recorded for 3 h. DTT-reduced and AT-2-oxidized cells served  
 509 as controls for calculation of OxD. Values displayed are the mean of three technical replicates  
 510 representative for five independent experiments. Error bars reflect the standard deviation. **(B)** The time  
 511 after which roGFP2 was completely oxidized was calculated to visualize differences in the re-oxidation  
 512 speed. Values (circles) are the mean of three technical replicates recorded in five independent  
 513 measurements. DTT-treatment did not result in re-oxidation during the 180 min measurement time. Error  
 514 bars reflect the standard deviation of the means. Significance test was performed using one way ANOVA.  
 515 \*\*\*\* $p < 0.0001$ . **(C)** Influence of monothiols on the re-oxidation of roGFP2 in the periplasm of *E. coli* cells  
 516 lacking DsbA after a reductive pulse. Values shown are the mean of three technical replicates,  
 517 representative for three independent experiments. Error bars depict the standard deviation. **(D)** The initial  
 518 re-oxidation velocity was calculated as linear regression for the first 25 min after start of the measurement  
 519 (dashed lines A). Values (circles) are the mean of three technical replicates recorded in three independent  
 520 repeats and error bars depict the standard deviation of those means. Significance test in was performed  
 521 using one-way ANOVA ns  $p > 0.05$ , \*\* $p < 0.01$ .

522 *Endogenous glutathione is involved in stabilizing and maintaining the periplasmic redox state*

523 All our experiments thus far were performed with exogenous glutathione. But we also  
 524 wondered about the role of endogenous glutathione, synthesized in *E. coli*'s cytoplasm. For  
 525 this, we determined the oxidation state of periplasmic roGFP-iL in cells lacking GshA, the  
 526 first enzyme of *E. coli*'s glutathione biosynthesis pathway. In glutathione-free media, these  
 527 cells do not contain GSH (Apontoweil and Berends, 1975; Carmel-Harel and Storz, 2000).  
 528 Confirming our observation with exogenous GSH, our experiment revealed a slightly, but

529 significantly lower oxidation of roGFP-iL in the periplasm of cells lacking GSH. The redox  
530 potential shifted from around  $-228$  mV (WT) to  $-233$  mV, counterintuitively a more reducing  
531 state, in the absence of GSH (Fig. 6A, B). Nevertheless, the shift was not as pronounced as in  
532 cells lacking DsbA, which had a roGFP-iL redox potential of around  $-243$  mV (Fig. 1E).  
533 We also asked whether the presence of endogenous GSH leads to faster re-oxidation of  
534 roGFP2. To address this question, we analyzed the capacity to restore the redox balance after  
535 reductive challenge in GSH-depleted cells producing periplasmic roGFP2 as described before.  
536 Our data indicates that roGFP2 oxidation rate and end oxidation state in the periplasm of  
537 GSH-deficient cells was comparable to WT (Fig. 6C, D) suggesting GSH is not essential for  
538 recovery after a reductive challenge.

539 Next, we asked what happens when both, DsbA and GSH are missing. The redox state of  
540 roGFP-iL in a  $\Delta gshA\Delta dsbA$  strain showed a periplasmic redox potential imposed on the  
541 sensor (ca.  $-244$  mV) similar to the redox potential in the *dsbA* single mutant (ca.  $-243$  mV)  
542 (Fig. 1, Fig. 6B). Intriguingly however, using a  $\Delta gshA\Delta dsbA$  strain in a periplasmic roGFP2  
543 re-oxidation assay revealed that exogenous GSSG did not completely restore WT oxidation  
544 rate and final oxidation state (Fig. 6E, F) contrary to cells lacking solely DsbA (Fig. 3).  
545 Adding GSH to a  $\Delta gshA\Delta dsbA$  strain even decelerated periplasmic roGFP2 oxidation,  
546 something we did not observe in the  $\Delta dsbA$  single mutant (Fig 3). These experiments indicate  
547 that a fine-tuned balance of reduced and oxidized glutathione plays a role in stabilizing and  
548 maintaining the redox environment in the periplasm of *E. coli*, and cells lacking both DsbA  
549 and endogenous glutathione can neither fully utilize the oxidative power of exogenous GSSG  
550 nor compensate the reductive power of GSH in their periplasm.

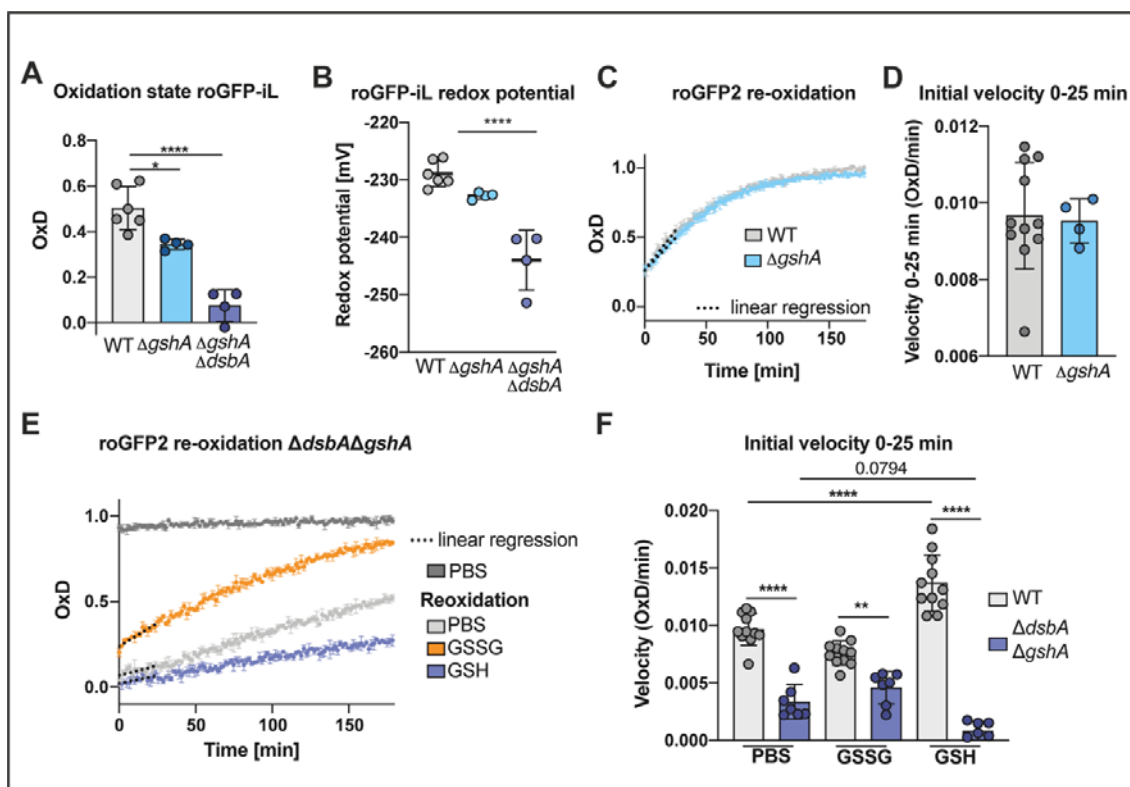

551

552 **Figure 6. Expression of roGFP probes in cells lacking DsbA and analysis of the periplasmic redox**  
 553 **potential and re-oxidation rates indicate that endogenous glutathione is involved in stabilizing and**  
 554 **maintaining the periplasmic redox state. (A)** Oxidation state (OxD) of roGFP-iL in the periplasm of WT  
 555 and cells lacking GSH. The emission at 525 nm was recorded after excitation at 395 nm or 465 nm of  
 556 roGFP-iL in the respective cells. Oxidized or reduced roGFP-iL was generated by treatment of cells with  
 557 AT-2 or DTT. **(B)** The periplasmic redox potential was calculated from (A) using the Nernst equation. The  
 558 Values (circles) are the mean of three technical replicates recorded in a minimum of four independent  
 559 repeats and error bars depict standard deviation of the means. Values for the WT were already shown in  
 560 Fig. 2 and are presented again for context. Significance tests in A and B were performed using ANOVA-  
 561 test. \*\*\*\* $p < 0.0001$ . **(C)** Re-oxidation of roGFP2 in the periplasm of *E. coli* WT and  $\Delta gshA$ . The assay was  
 562 performed as described in Fig. 2. One representative example out of at least four individual repeats is  
 563 shown. Error bars represent standard deviation of technical triplicates. **(D)** The initial re-oxidation  
 564 velocity was calculated from linear regression for the first 25 min after start of the measurement (dashed lines in B).  
 565 Values shown as circles are the mean of three technical repeats recorded in at least four independent assays.  
 566 **(E)** Re-oxidation of periplasmic roGFP2 in *E. coli*  $\Delta gshA \Delta dsbA$ . One representative example out of at least  
 567 seven individual repeats is shown. Error bars represent standard deviation of technical triplicates. **(F)** The  
 568 initial re-oxidation velocity was calculated from linear regression in the first 25 min after start of the  
 569 measurement (dashed lines). Values (circles) are the mean of three technical replicates recorded in a  
 570 minimum of seven independent repeats. Error bars represent the standard deviation. Significance test was  
 571 performed using one way ANOVA. \*\* $p < 0.01$ , \*\*\*\* $p < 0.0001$ . Values for the WT were already shown in  
 572 Fig. 3 and are presented again for context.

573 *Endogenous glutathione is involved in disulfide bond formation in E. coli's own periplasmic*  
574 *proteins*

575 The observed influence of GSH on growth phenotypes (Supplementary figure 3) suggests that  
576 our previous observations of disulfide bond formation in heterologously expressed roGFP-  
577 based redox sensors also apply to endogenous DsbA substrates. One well-characterized  
578 substrate of DsbA is alkaline phosphatase PhoA. PhoA is only active upon formation of  
579 intramolecular disulfide bonds essential for correct protein folding. The activity of this  
580 enzyme can be measured in a colorimetric assay using the substrate *para*-  
581 nitrophenolphosphate (Fig. 7A) (Berg, 1981; Brickman and Beckwith, 1975; Sone et al.,  
582 1997). We thus tested the activity of alkaline phosphatase PhoA in different *E. coli* deletion  
583 strains grown in MOPS minimal medium. As described above, the lack of GSH, although  
584 without effect on re-oxidation of roGFP2 in the periplasm, slightly shifted the periplasmic  
585 redox homeostasis to more reducing conditions, as seen in the lowered redox potential of  
586 roGFP-iL in those cells (Fig. 6). In accordance with this, PhoA activity was slightly, but  
587 significantly lowered in GSH-deficient cells compared to WT. Also, in line with our previous  
588 results (Fig. 1), cells lacking DsbA showed only poor PhoA activity, and the same was true  
589 for cells lacking both DsbA and GSH (Fig. 7B).

590 To test whether the observed reduction in PhoA activity is dependent on glutathione levels in  
591 the periplasm, we also measured PhoA activity in a *cydD* mutant. This mutant can still  
592 synthesize glutathione, but is not able to produce the inner membrane ABC-transporter  
593 CydDC that transports glutathione from the cytosol into the periplasm and hence suffers from  
594 reduced periplasmic glutathione levels (Mironov et al., 2020; Pittman et al., 2005; Shepherd,  
595 2015). Again, we observed a slight, but significant reduction of PhoA activity in this strain,  
596 although less pronounced than in cells completely lacking glutathione biosynthesis (Fig. 7B).  
597 Conversely, blocking glutathione transport from the periplasm into the cytosol by deleting

598 GsiC, the inner membrane component of the GsiA-D ABC Transporter (Suzuki et al., 2005;  
599 Wang et al., 2017, 2018) did not result in significant changes in PhoA activity compared to  
600 the WT.

601 Next, we supplemented the growth medium with exogenous GSSG to test if, in accordance  
602 with the re-oxidation assays (Fig. 3) and the rescue of the growth phenotype (Supplementary  
603 figure 3), it can assist in oxidative folding of PhoA in the absence of DsbA. Indeed, GSSG  
604 addition restored PhoA activity back to WT level (Fig. 7C). Furthermore, addition of  
605 exogenous GSSG also increased PhoA activity in the WT, contrary to what we observed with  
606 roGFP2, suggesting that the role of periplasmic glutathione in oxidative folding differs,  
607 depending on the protein in question (Fig. 3, Supplementary figure 3).

608 Proteins that are not correctly folded are usually unstable in the periplasm (Hiniker and  
609 Bardwell, 2004), and thus no PhoA protein could be detected on a western blot in DsbA-  
610 deficient cells (Fig. 7D). External GSSG addition prevented PhoA from degradation in a  
611  $\Delta dsbA$  mutant.

612 Taken together, our data indicates a significant role for glutathione, not only in oxidative  
613 protein folding of periplasmic proteins, but also by balancing and maintaining the periplasmic  
614 redox homeostasis.

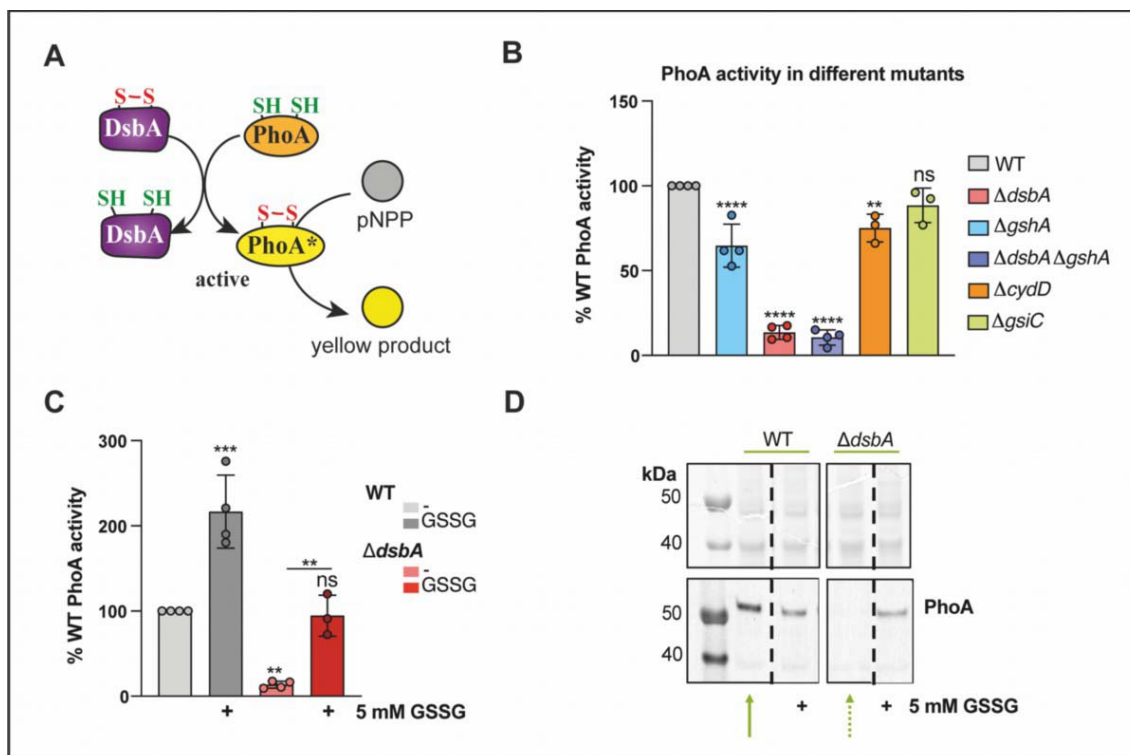

615

616 **Figure 7. Endogenous alkaline phosphatase (PhoA) is less active in the absence of glutathione and**  
 617 **DsbA in the periplasm, and GSSG restores oxidative folding of PhoA in the absence of DsbA. (A)**  
 618 PhoA activity depends on oxidation by DsbA and activity of PhoA can be monitored using *p*-  
 619 nitrophenylphosphate (pNPP) resulting in formation of the yellow product *p*-nitrophenol. **(B)** PhoA activity  
 620 was assayed in cells cultivated in MOPS medium for 24 h at 37 °C. Release of *p*-nitrophenol from the  
 621 PhoA substrate pNPP was measured and relative PhoA activity in % of WT activity was calculated. **(C)**  
 622 GSSG restores PhoA activity to WT level in cells lacking DsbA. Cells were cultivated in MOPS medium  
 623 in the presence of 5 mM GSSG for 18 h at 37 °C. Then fresh GSSG (5 mM) was added and the cells were  
 624 incubated for 1 h. PhoA activity was assayed as described above. **(D)** PhoA accumulation was analyzed by  
 625 SDS-PAGE and western blot in cells cultivated as described in **(C)**. For western blot a PhoA specific first  
 626 and a fluorophore-coupled second antibody were used and fluorescence signal was scanned. Values in B  
 627 and C are the mean of at least three independent replicates of duplicate assays with error bars representing  
 628 the standard deviation. Significance test was performed using one way ANOVA. ns  $p > 0.05$  \* $p < 0.05$ ,  
 629 \*\* $p < 0.01$ , \*\*\* $p < 0.001$ , \*\*\*\* $p < 0.0001$ .

630 **Discussion:**

631 The DsbA/B system is the major thiol oxidation system in the periplasm of *E. coli* and  
632 together with the DsbC/D thiol disulfide isomerase system forms the oxidative folding  
633 machinery (Collet and Bardwell, 2002; Manta et al., 2019). The standard redox potentials of  
634 those systems are known (Wunderlich et al., 1993; Zapun et al., 1995), but the *in vivo* redox  
635 potential seen by protein thiol disulfide pairs in the periplasm is unknown. Here, we used the  
636 genetically encoded proteins roGFP2 and roGFP-iL targeted to the periplasm to directly probe  
637 the thiol redox homeostasis in this compartment. When expressed in the cytosol of *E. coli*, the  
638 probe roGFP2 with a midpoint redox potential of  $-280$  mV is almost completely reduced  
639 (Degrossoli et al., 2018). However, we found that it is virtually fully oxidized, when  
640 expressed in the periplasm, suggesting that its engineered cysteine residues are completely  
641 oxidized by the oxidative folding machinery.

642 To our surprise, roGFP2 was also fully oxidized in cells lacking the major thiol oxidase in the  
643 periplasm, DsbA. We thus also analyzed the re-oxidation capacity after a reductive pulse, as  
644 the oxidation state in an unperturbed cell solely reflects the steady state. And in the absence of  
645 DsbA we did indeed find a significantly diminished re-oxidation velocity underlining the  
646 importance of DsbA for oxidative folding.

647 Using roGFP-iL, we were able to determine that the redox potential imposed onto a thiol pair  
648 in the periplasm is  $-229$  mV. In the absence of DsbA, this redox potential shifted to a more  
649 reducing  $-243$  mV. In a previous study, Messens et al. used an Ag/AgCl electrode to measure  
650 the redox potential in *E. coli* WT periplasmic extracts (Messens et al., 2007). Typically, an  
651 electrode will measure the redox potential of all species it can chemically interact with and in  
652 this case the redox potential was determined to be  $-165$  mV. Unexpectedly, in their setting,  
653 removal of DsbA shifted the redox potential to an even more oxidizing redox potential. Our  
654 finding that the thiol disulfide redox potential is significantly below the overall redox

655 potential observed by Messens et al. with an electrode could explain their seemingly  
656 paradoxical finding, since in a  $\Delta dsbA$  strain a component that is reducing in comparison to the  
657 overall redox potential measured by the electrode is removed from the overall redox pool. In  
658 our case, removal of DsbA did indeed result in an overall more reducing redox potential  
659 imposed on thiol pairs.

660 In concordance with our results in the periplasm, roGFP2 targeted to the ER is fully oxidized,  
661 as well. Similarly, a roGFP2-iL-Grx1 fusion redox probe targeted to the ER of *Arabidopsis*  
662 *thaliana* cells lacking Ero1/2, the functional homolog of DsbB in eukaryotes was more  
663 reduced, and re-oxidation after a reductive pulse was inhibited by the lack of Ero1/2 (Ugalde  
664 et al., 2022).

665 While roGFP2 re-oxidation was diminished in  $\Delta dsbA$ , it was not absent, suggesting to us the  
666 presence of an alternative pathway for disulfide bond formation. As glutathione is one of the  
667 major redox buffers in cells, we assumed a possible role for the small molecule in periplasmic  
668 redox homeostasis. Glutathione's cytosolic functions have been studied extensively and, until  
669 a few years back, GSH was thought to be absent from the periplasm (Pittman et al., 2005).

670 However, relatively high glutathione levels in the periplasm of *E. coli* were discovered  
671 recently, and since, there is an ongoing debate on its function in this compartment (Delaunay-  
672 Moisan et al., 2017; Eser et al., 2009; Pittman et al., 2005). Interestingly, cells lacking the  
673 transporter for GSH from the cytosol to the periplasm, CydDC, exhibit several phenotypes,  
674 including DTT sensitivity and swarming defects; also found in cells deficient in oxidative  
675 protein folding. This is an additional indication for a role of GSH in redox homeostasis and  
676 oxidative folding in the periplasm. (Fabianek et al., 2000; Goldman et al., 1996; Pittman et al.,  
677 2005; Smirnova et al., 2012). Accordingly, we found that re-oxidation of periplasmic roGFP2  
678 in  $\Delta dsbA$  was restored by the addition of exogenous GSSG, while it was not influenced in  
679 WT. Surprisingly, adding exogenous GSH to the WT accelerated roGFP2 re-oxidation, but  
680 not in a  $\Delta dsbA$  strain. We also observed this seemingly paradoxical acceleration of thiol re-



681 oxidation in WT by other reducing monothiols like cysteine or  $\beta$ -mercaptoethanol. However,  
682 we did not observe direct interactions of DsbA with glutathione *in vitro* and in our yeast cell  
683 experiments.

684 We next assessed the role of endogenous glutathione in the redox balance of the periplasm.  
685 And in line with our observations with exogenous GSH, the oxidation state of roGFP-iL was  
686 slightly shifted to a more reducing state in  $\Delta gshA$ , indicating a role for endogenous  
687 glutathione in the periplasmic redox homeostasis as well. It should be noted, however, that  
688 roGFP2 re-oxidation in a GSH-deficient mutant was comparable to WT. Taken together, the  
689 presence of GSH and GSSG in the periplasm, driven by the availability of exogenous and  
690 endogenous glutathione, seems to be important for the fine-tuning of the periplasmic redox  
691 potential.

692 Expression of a non-native redox sensor might not reflect the natural redox state in the  
693 periplasm or might even influence it by diverting oxidative power available for the formation  
694 of native disulfide bonds. We thus analyzed the activity of PhoA, a native *E. coli* protein,  
695 which depends on oxidation by DsbA for its activity, in different mutants. This approach  
696 revealed that reduced periplasmic glutathione levels indeed resulted in significantly lower  
697 PhoA activity, in line with the more reduced roGFP-iL redox state in  $\Delta gshA$ . While PhoA's  
698 oxidative folding is clearly influenced by the presence or absence of GSH, not all DsbA  
699 substrates seem to be influenced by glutathione. RNaseI folding and isomerization by  
700 DsbA/DsbC e.g., was not influenced by the loss of GSH (Messens et al., 2007).

701 In order to understand the role of glutathione in the periplasm, it is helpful to have a look at  
702 the role of GSH in the eukaryotic ER, for which, in contrast to bacteria, more studies are  
703 available. In the ER, the glutathione concentration is around 15 mM, higher than in whole cell  
704 lysates with around 7 mM (Birk et al., 2013). Similar to the periplasm, the GSH:GSSG ratio  
705 in the ER is lower (3:1 to 1:1) compared to the cytosol (100:1), resulting in a more oxidizing  
706 environment (Hwang et al., 1992). It is discussed whether GSH is the reductive power for

707 disulfide isomerization by PDI (Vitu et al., 2010) and high GSSG levels could act as oxidant  
708 reservoir; however, it is still unclear if GSSG itself is able to oxidize PDI (Lappi and  
709 Ruddock, 2011; Ushioda and Nagata, 2019). In the periplasm of Gram-negative bacteria,  
710 DsbB recycles DsbA, but in contrast to Ero1, it uses the respiratory chain as electron sink. As  
711 aforementioned, we observed accelerated roGFP2 re-oxidation in the WT, but not in  $\Delta dsbA$ ,  
712 when adding monothiols to the cells and the opposite effect for GSSG, compensating the lack  
713 of DsbA, raising the question whether DsbB is somehow regulated by glutathione. However,  
714 analyzing a *dsbB* mutant strain regarding its oxidation state and re-oxidation capacity in  
715 presence or absence of GSH or GSSG revealed that GSSG was still able to complement for  
716 the loss of DsbB, indicating a DsbB-independent mechanism (Supplementary figure 4).  
717 Overall, we showed that oxidized glutathione can compensate for the loss of DsbA by an  
718 unknown mechanism. One possibility is that oxidized glutathione directly oxidizes roGFP2  
719 and other reduced proteins, however previous studies (Müller et al., 2017) and the current *in*  
720 *vitro* and yeast data show that direct roGFP2 oxidation by glutathione is very inefficient.  
721 Another possibility is the presence of a yet unidentified redox factor in the periplasm that can  
722 catalyze oxidative protein folding in the absence of DsbA. One possibility is DsbC and it has  
723 been suggested that reduced glutathione can react with the isomerase, especially by providing  
724 reductive power when DsbD is missing (Pittman et al., 2005; Smirnova et al., 2012).  
725 However, (Messens et al., 2007) could also show that DsbC alone was not able to substitute  
726 for DsbA in folding of RNaseI. In the ER up to 20 different oxidoreductases, for example the  
727 peroxiredoxin Prx4 or the glutathione peroxidase-like enzymes Gpx7 and Gpx8 are found  
728 besides PDI and for at least some of them it has been proposed that they possibly oxidize PDI  
729 (Nguyen et al., 2011; Wang et al., 2018; Zito et al., 2010). We think it is possible, that *E. coli*  
730 has a similar backup system for DsbA, presumably a glutaredoxin-like protein, which is  
731 coupled to the periplasm's glutathione pool, providing either oxidizing or reducing power.

732 Taken together, our data underlines the importance of glutathione as a player in redox  
733 homeostasis not only in the cytosol, but also in oxidative cellular compartments and it shows  
734 that its role in oxidative protein folding did already evolve in bacteria.

735 **Acknowledgements**

736 We thank Franz Narberhaus for use of the fluorescence microscope for visualization of the  
737 correct localization of the roGFP probes.

738 **Author contributions**

739 LRK and LIL designed the study. LRK planned and performed most of the experiments. The  
740 yeast cell assays were designed and conducted by JZ and BM. JFS performed initial  
741 experiments, established the re-oxidation assay and constructed the pPT and pPT\_rogFP2  
742 plasmids. NL and BC purified proteins and BC assisted with DsbA *in vitro* assays. LRK and  
743 LIL wrote the manuscript. All authors consulted on the manuscript and approved the final  
744 version.

745 **Conflict of interest**

746 The authors declare that they have no conflicts of interest with the contents of this article.

747 **Funding**

748 LIL acknowledges funding from the German Research Foundation (DFG) through grant  
749 LE2905-2 and additional funding through the InnovationsFoRUM Host-Microbe-Interaction  
750 IF-018N-22-TP8.

751 **Data availability statement**

752 The data supporting the findings of this study is presented within the article and its  
753 supplementary materials. Strains and plasmids constructed for this study are available upon  
754 request.

## 755 References

- 756 Ali Khan, H., Mutus, B., 2014. Protein disulfide isomerase a multifunctional protein with  
757 multiple physiological roles. *Front. Chem.* 2.  
758 <https://doi.org/10.3389/fchem.2014.00070>
- 759 Andersen, C.L., Matthey-Dupraz, A., Missiakas, D., Raina, S., 1997. A new *Escherichia coli*  
760 gene, *dsbG*, encodes a periplasmic protein involved in disulphide bond formation,  
761 required for recycling DsbA/DsbB and DsbC redox proteins. *Mol. Microbiol.* 26, 121–  
762 132. <https://doi.org/10.1046/j.1365-2958.1997.5581925.x>
- 763 Apontoweil, P., Berends, W., 1975. Isolation and initial characterization of glutathione-  
764 deficient mutants of *Escherichia coli* K 12. *Biochim. Biophys. Acta BBA - Gen. Subj.*  
765 399, 10–22. [https://doi.org/10.1016/0304-4165\(75\)90206-8](https://doi.org/10.1016/0304-4165(75)90206-8)
- 766 Aslund, F., Ehn, B., Miranda-Vizuete, A., Pueyo, C., Holmgren, A., 1994. Two additional  
767 glutaredoxins exist in *Escherichia coli*: glutaredoxin 3 is a hydrogen donor for  
768 ribonucleotide reductase in a thioredoxin/glutaredoxin 1 double mutant. *Proc. Natl.*  
769 *Acad. Sci.* 91, 9813–9817. <https://doi.org/10.1073/pnas.91.21.9813>
- 770 Åslund, F., Zheng, M., Beckwith, J., Storz, G., 1999. Regulation of the OxyR transcription  
771 factor by hydrogen peroxide and the cellular thiol—disulfide status. *Proc. Natl. Acad.*  
772 *Sci.* 96, 6161–6165. <https://doi.org/10.1073/pnas.96.11.6161>
- 773 Baba, T., Ara, T., Hasegawa, M., Takai, Y., Okumura, Y., Baba, M., Datsenko, K.A., Tomita,  
774 M., Wanner, B.L., Mori, H., 2006. Construction of *Escherichia coli* K-12 in-frame,  
775 single-gene knockout mutants: the Keio collection. *Mol. Syst. Biol.* 2, 2006.0008.  
776 <https://doi.org/10.1038/msb4100050>
- 777 Bardwell, J.C., Lee, J.O., Jander, G., Martin, N., Belin, D., Beckwith, J., 1993. A pathway for  
778 disulfide bond formation *in vivo*. *Proc. Natl. Acad. Sci.* 90, 1038–1042.  
779 <https://doi.org/10.1073/pnas.90.3.1038>
- 780 Bardwell, J.C.A., McGovern, K., Beckwith, J., 1991. Identification of a protein required for  
781 disulfide bond formation *in vivo*. *Cell* 67, 581–589. [https://doi.org/10.1016/0092-8674\(91\)90532-4](https://doi.org/10.1016/0092-8674(91)90532-4)
- 782
- 783 Berg, P.E., 1981. Cloning and characterization of the *Escherichia coli* gene coding for  
784 alkaline phosphatase. *J. Bacteriol.* 146, 660–667. <https://doi.org/10.1128/jb.146.2.660-667.1981>
- 785
- 786 Birk, J., Meyer, M., Aller, I., Hansen, H.G., Odermatt, A., Dick, T.P., Meyer, A.J.,  
787 Appenzeller-Herzog, C., 2013. Endoplasmic reticulum: reduced and oxidized  
788 glutathione revisited. *J. Cell Sci.* 126, 1604–1617. <https://doi.org/10.1242/jcs.117218>
- 789 Brickman, E., Beckwith, J., 1975. Analysis of the regulation of *Escherichia coli* alkaline  
790 phosphatase synthesis using deletions and  $\phi 80$  transducing phages. *J. Mol. Biol.* 96,  
791 307–316. [https://doi.org/10.1016/0022-2836\(75\)90350-2](https://doi.org/10.1016/0022-2836(75)90350-2)
- 792 Carmel-Harel, O., Storz, G., 2000. Roles of the glutathione- and thioredoxin-dependent  
793 reduction systems in the *Escherichia coli* and *Saccharomyces cerevisiae* Responses to  
794 Oxidative Stress. *Annu. Rev. Microbiol.* 54, 439–461.  
795 <https://doi.org/10.1146/annurev.micro.54.1.439>
- 796 Cho, S.-H., Collet, J.-F., 2013. Many roles of the bacterial envelope reducing pathways.  
797 *Antioxid. Redox Signal.* 18, 1690–1698. <https://doi.org/10.1089/ars.2012.4962>
- 798 Christensen, S., Grøftehauge, M.K., Byriel, K., Huston, W.M., Furlong, E., Heras, B., Martin,  
799 J.L., McMahon, R.M., 2016. Structural and biochemical characterization of  
800 *Chlamydia trachomatis* DsbA reveals a cysteine-rich and weakly oxidising  
801 oxidoreductase. *PLOS ONE* 11, 1–22. <https://doi.org/10.1371/journal.pone.0168485>
- 802 Collet, J.-F., Bardwell, J.C.A., 2002. Oxidative protein folding in bacteria. *Mol. Microbiol.*  
803 44, 1–8. <https://doi.org/10.1046/j.1365-2958.2002.02851.x>

- 804 Degrossoli, A., Müller, A., Xie, K., Schneider, J.F., Bader, V., Winklhofer, K.F., Meyer, A.J.,  
805 Leichert, L.I., 2018. Neutrophil-generated HOCl leads to non-specific thiol oxidation  
806 in phagocytized bacteria. *eLife* 7, e32288. <https://doi.org/10.7554/eLife.32288>  
807 Delaunay-Moisan, A., Ponsero, A., Toledano, M.B., 2017. Reexamining the function of  
808 glutathione in oxidative protein folding and secretion. *Antioxid. Redox Signal.* 27,  
809 1178–1199. <https://doi.org/10.1089/ars.2017.7148>  
810 Delic, M., Mattanovich, D., Gasser, B., 2010. Monitoring intracellular redox conditions in the  
811 endoplasmic reticulum of living yeasts. *FEMS Microbiol. Lett.* 306, 61–66.  
812 <https://doi.org/10.1111/j.1574-6968.2010.01935.x>  
813 Dooley, C.T., Dore, T.M., Hanson, G.T., Jackson, W.C., Remington, S.J., Tsien, R.Y., 2004.  
814 Imaging dynamic redox changes in mammalian cells with green fluorescent protein  
815 indicators. *J. Biol. Chem.* 279, 22284–22293. <https://doi.org/10.1074/jbc.M312847200>  
816 Eser, M., Masip, L., Kadokura, H., Georgiou, G., Beckwith, J., 2009. Disulfide bond  
817 formation by exported glutaredoxin indicates glutathione's presence in the *E. coli*  
818 periplasm. *Proc. Natl. Acad. Sci.* 106, 1572–1577.  
819 <https://doi.org/10.1073/pnas.0812596106>  
820 Fabianek, R.A., Hennecke, H., Thöny-Meyer, L., 2000. Periplasmic protein thiol:disulfide  
821 oxidoreductases of *Escherichia coli*. *FEMS Microbiol. Rev.* 24, 303–316.  
822 [https://doi.org/10.1016/S0168-6445\(00\)00028-0](https://doi.org/10.1016/S0168-6445(00)00028-0)  
823 Fahey, R.C., Brown, W.C., Adams, W.B., Worsham, M.B., 1978. Occurrence of glutathione  
824 in bacteria. *J. Bacteriol.* 133, 1126–1129. [https://doi.org/10.1128/jb.133.3.1126-](https://doi.org/10.1128/jb.133.3.1126-1129.1978)  
825 [1129.1978](https://doi.org/10.1128/jb.133.3.1126-1129.1978)  
826 Goldman, B.S., Gabbert, K.K., Kranz, R.G., 1996. The temperature-sensitive growth and  
827 survival phenotypes of *Escherichia coli cydDC* and *cydAB* strains are due to  
828 deficiencies in cytochrome bd and are corrected by exogenous catalase and reducing  
829 agents. *J. Bacteriol.* 178, 6348–6351. [https://doi.org/10.1128/jb.178.21.6348-](https://doi.org/10.1128/jb.178.21.6348-6351.1996)  
830 [6351.1996](https://doi.org/10.1128/jb.178.21.6348-6351.1996)  
831 Greer, S., Perham, R.N., 1986. Glutathione reductase from *Escherichia coli*: cloning and  
832 sequence analysis of the gene and relationship to other flavoprotein disulfide  
833 oxidoreductases. *Biochemistry* 25, 2736–2742. <https://doi.org/10.1021/bi00357a069>  
834 Gutscher, M., Pauleau, A.-L., Marty, L., Brach, T., Wabnitz, G.H., Samstag, Y., Meyer, A.J.,  
835 Dick, T.P., 2008. Real-time imaging of the intracellular glutathione redox potential.  
836 *Nat. Methods* 5, 553–559. <https://doi.org/10.1038/nmeth.1212>  
837 Hiniker, A., Bardwell, J.C.A., 2004. *In vivo* substrate specificity of periplasmic disulfide  
838 oxidoreductases \*. *J. Biol. Chem.* 279, 12967–12973.  
839 <https://doi.org/10.1074/jbc.M311391200>  
840 Holyoake, L.V., Hunt, S., Sanguinetti, G., Cook, G.M., Howard, M.J., Rowe, M.L., Poole,  
841 R.K., Shepherd, M., 2016. CydDC-mediated reductant export in *Escherichia coli*  
842 controls the transcriptional wiring of energy metabolism and combats nitrosative  
843 stress. *Biochem. J.* 473, 693–701. <https://doi.org/10.1042/BJ20150536>  
844 Hwang, C., Sinskey, A.J., Lodish, H.F., 1992. Oxidized redox state of glutathione in the  
845 endoplasmic reticulum. *Science* 257, 1496–1502.  
846 <https://doi.org/10.1126/science.1523409>  
847 Inaba, K., Ito, K., 2008. Structure and mechanisms of the DsbB–DsbA disulfide bond  
848 generation machine. *Biochim. Biophys. Acta BBA - Mol. Cell Res.* 1783, 520–529.  
849 <https://doi.org/10.1016/j.bbamcr.2007.11.006>  
850 Inaba, K., Murakami, S., Nakagawa, A., Iida, H., Kinjo, M., Ito, K., Suzuki, M., 2009.  
851 Dynamic nature of disulphide bond formation catalysts revealed by crystal structures  
852 of DsbB. *EMBO J.* 28, 779–791. <https://doi.org/10.1038/emboj.2009.21>  
853 Kadokura, H., Tian, H., Zander, T., Bardwell, J.C.A., Beckwith, J., 2004. Snapshots of DsbA  
854 in action: detection of proteins in the process of oxidative folding. *Science* 303, 534–

- 855 537. <https://doi.org/10.1126/science.1091724>
- 856 Lappi, A.-K., Ruddock, L.W., 2011. Reexamination of the role of interplay between  
857 glutathione and protein disulfide isomerase. *J. Mol. Biol.* 409, 238–249.  
858 <https://doi.org/10.1016/j.jmb.2011.03.024>
- 859 Lohman, J.R., Remington, S.J., 2008. Development of a family of redox-sensitive green  
860 fluorescent protein indicators for use in relatively oxidizing subcellular environments.  
861 *Biochemistry* 47, 8678–8688. <https://doi.org/10.1021/bi800498g>
- 862 Lukyanov, K.A., Belousov, V.V., 2014. Genetically encoded fluorescent redox sensors.  
863 *Biochim. Biophys. Acta BBA - Gen. Subj.* 1840, 745–756.  
864 <https://doi.org/10.1016/j.bbagen.2013.05.030>
- 865 Manta, B., Boyd, D., Berkmen, M., 2019. Disulfide Bond Formation in the Periplasm of  
866 *Escherichia coli*. *EcoSal Plus* 8. <https://doi.org/10.1128/ecosalplus.ESP-0012-2018>
- 867 Martin, J.L., Bardwell, J.C.A., Kuriyan, J., 1993. Crystal structure of the DsbA protein  
868 required for disulphide bond formation *in vivo*. *Nature* 365, 464–468.  
869 <https://doi.org/10.1038/365464a0>
- 870 Masip, L., Veeravalli, K., Georgiou, G., 2006. The many faces of glutathione in bacteria.  
871 *Antioxid. Redox Signal.* 8, 753–762. <https://doi.org/10.1089/ars.2006.8.753>
- 872 Meister, A., 1988. Glutathione metabolism and its selective modification. *J Biol Chem.* 1988  
873 Nov 25;263(33):17205-8. PMID: 3053703. *J. Biol. Chem.* Chem 25.
- 874 Messens, J., Collet, J.-F., Belle, K.V., Brosens, E., Loris, R., Wyns, L., 2007. The oxidase  
875 DsbA folds a protein with a nonconsecutive disulfide. *J. Biol. Chem.* 282, 31302–  
876 31307. <https://doi.org/10.1074/jbc.M705236200>
- 877 Meyer, A.J., Dick, T.P., 2010. Fluorescent protein-based redox probes. *Antioxid. Redox*  
878 *Signal.* 13, 621–650. <https://doi.org/10.1089/ars.2009.2948>
- 879 Mironov, A., Seregina, T., Shatalin, K., Nagornykh, M., Shakulov, R., Nudler, E., 2020.  
880 CydDC functions as a cytoplasmic cystine reductase to sensitize *Escherichia coli* to  
881 oxidative stress and aminoglycosides. *Proc. Natl. Acad. Sci.* 117, 23565–23570.  
882 <https://doi.org/10.1073/pnas.2007817117>
- 883 Missiakas, D., Georgopoulos, C., Raina, S., 1994. The *Escherichia coli* *dsbC* (*xprA*) gene  
884 encodes a periplasmic protein involved in disulfide bond formation. *EMBO J.* 13,  
885 2013–2020. <https://doi.org/10.1002/j.1460-2075.1994.tb06471.x>
- 886 Missiakas, D., Georgopoulos, C., Raina, S., 1993. Identification and characterization of the  
887 *Escherichia coli* gene *dsbB*, whose product is involved in the formation of disulfide  
888 bonds *in vivo*. *Proc. Natl. Acad. Sci.* 90, 7084–7088.  
889 <https://doi.org/10.1073/pnas.90.15.7084>
- 890 Müller, A., Schneider, J.F., Degrossoli, A., Lupilova, N., Dick, T.P., Leichert, L.I., 2017.  
891 Systematic *in vitro* assessment of responses of roGFP2-based probes to  
892 physiologically relevant oxidant species. *Free Radic. Biol. Med.* 106, 329–338.  
893 <https://doi.org/10.1016/j.freeradbiomed.2017.02.044>
- 894 Nguyen, V.D., Saaranen, M.J., Karala, A.-R., Lappi, A.-K., Wang, L., Raykhel, I.B., Alanen,  
895 H.I., Salo, K.E.H., Wang, C., Ruddock, L.W., 2011. Two endoplasmic reticulum PDI  
896 peroxidases increase the efficiency of the use of peroxide during disulfide bond  
897 formation. *J. Mol. Biol.* 406, 503–515. <https://doi.org/10.1016/j.jmb.2010.12.039>
- 898 Nilewski, S., Varatnitskaya, M., Masuch, T., Kusnezowa, A., Gellert, M., Baumann, A.F.,  
899 Lupilov, N., Kusnezow, W., Koch, M.-H., Eisenacher, M., Berkmen, M., Lillig, C.H.,  
900 Leichert, L.I., 2021. Functional metagenomics of the thioredoxin superfamily. *J. Biol.*  
901 *Chem.* 296. <https://doi.org/10.1074/jbc.RA120.016350>
- 902 Palmer, T., Berks, B.C., 2012. The twin-arginine translocation (Tat) protein export pathway.  
903 *Nat. Rev. Microbiol.* 10, 483–496. <https://doi.org/10.1038/nrmicro2814>
- 904 Pittman, M.S., Robinson, H.C., Poole, R.K., 2005. A bacterial glutathione transporter  
905 (*Escherichia coli* CydDC) exports reductant to the periplasm. *J. Biol. Chem.* 280,

- 906 32254–32261. <https://doi.org/10.1074/jbc.M503075200>
- 907 Rietsch, A., Bessette, P., Georgiou, G., Beckwith, J., 1997. Reduction of the periplasmic  
908 disulfide bond isomerase, DsbC, occurs by passage of electrons from cytoplasmic  
909 thioredoxin. *J. Bacteriol.* 179, 6602–6608. [https://doi.org/10.1128/jb.179.21.6602-](https://doi.org/10.1128/jb.179.21.6602-6608.1997)  
910 6608.1997
- 911 Santini, C.-L., Bernadac, A., Zhang, M., Chanal, A., Ize, B., Blanco, C., Wu, L.-F., 2001.  
912 Translocation of jellyfish green fluorescent protein via the Tat system of *Escherichia*  
913 *coli* and change of its periplasmic localization in response to osmotic Up-shock. *J.*  
914 *Biol. Chem.* 276, 8159–8164. <https://doi.org/10.1074/jbc.C000833200>
- 915 Schneider, C.A., Rasband, W.S., Eliceiri, K.W., 2012. NIH Image to ImageJ: 25 years of  
916 image analysis. *Nat. Methods* 9, 671–675. <https://doi.org/10.1038/nmeth.2089>
- 917 Shepherd, M., 2015. The CydDC ABC transporter of *Escherichia coli*: new roles for a  
918 reductant efflux pump. *Biochem. Soc. Trans.* 43, 908–912.  
919 <https://doi.org/10.1042/BST20150098>
- 920 Shevchik, V.E., Condemine, G., Robert-Baudouy, J., 1994. Characterization of DsbC, a  
921 periplasmic protein of *Erwinia chrysanthemi* and *Escherichia coli* with disulfide  
922 isomerase activity. *EMBO J.* 13, 2007–2012. [https://doi.org/10.1002/j.1460-](https://doi.org/10.1002/j.1460-2075.1994.tb06470.x)  
923 2075.1994.tb06470.x
- 924 Smirnova, G., Muzyka, N., Oktyabrsky, O., 2012. Transmembrane glutathione cycling in  
925 growing *Escherichia coli* cells. *Microbiol. Res.* 167, 166–172.  
926 <https://doi.org/10.1016/j.micres.2011.05.005>
- 927 Smirnova, G.V., Muzyka, N.G., Oktyabrsky, O.N., 2005. Effects of cystine and hydrogen  
928 peroxide on glutathione status and expression of antioxidant genes in *Escherichia coli*.  
929 *Biochem. Mosc.* 70, 926–934. <https://doi.org/10.1007/s10541-005-0204-2>
- 930 Smirnova, G.V., Oktyabrsky, O.N., 2005. Glutathione in bacteria. *Biochem. Mosc.* 70, 1199–  
931 1211. <https://doi.org/10.1007/s10541-005-0248-3>
- 932 Smirnova, G.V., Tyulenev, A.V., Muzyka, N.G., Oktyabrsky, O.N., 2020. Study of the  
933 relationship between extracellular superoxide and glutathione production in batch  
934 cultures of *Escherichia coli*. *Res. Microbiol.* 171, 301–310.  
935 <https://doi.org/10.1016/j.resmic.2020.07.004>
- 936 Sone, M., Akiyama, Y., Ito, K., 1997. Differential *in vivo* roles played by DsbA and DsbC in  
937 the formation of protein disulfide bonds\*. *J. Biol. Chem.* 272, 10349–10352.  
938 <https://doi.org/10.1074/jbc.272.16.10349>
- 939 Song, Y., Zhou, Z., Gu, J., Yang, J., Deng, J., 2021. Reducing the periplasmic glutathione  
940 content makes *Escherichia coli* resistant to trimethoprim and other antimicrobial  
941 drugs. *Microbiol. Spectr.* 9, e00743-21. <https://doi.org/10.1128/Spectrum.00743-21>
- 942 Suzuki, H., Koyanagi, T., Izuka, S., Onishi, A., Kumagai, H., 2005. The *yliA*, *-B*, *-C*, and *-D*  
943 Genes of *Escherichia coli* K-12 Encode a Novel Glutathione Importer with an ATP-  
944 Binding Cassette. *J. Bacteriol.* 187, 5861–5867.  
945 <https://doi.org/10.1128/JB.187.17.5861-5867.2005>
- 946 Thomas, J.D., Daniel, R.A., Errington, J., Robinson, C., 2001. Export of active green  
947 fluorescent protein to the periplasm by the twin-arginine translocase (Tat) pathway in  
948 *Escherichia coli*. *Mol. Microbiol.* 39, 47–53. [https://doi.org/10.1046/j.1365-](https://doi.org/10.1046/j.1365-2958.2001.02253.x)  
949 2958.2001.02253.x
- 950 Thomason, L.C., Costantino, N., Court, D.L., 2007. *E. coli* Genome Manipulation by P1  
951 Transduction. *Curr. Protoc. Mol. Biol.* 79, 1.17.1-1.17.8.  
952 <https://doi.org/10.1002/0471142727.mb0117s79>
- 953 Tu, B.P., Weissman, J.S., 2004. Oxidative protein folding in eukaryotes—mechanisms and  
954 consequences. *J. Cell Biol.* 164, 341–346. <https://doi.org/10.1083/jcb.200311055>
- 955 Tuggle, C.K., Fuchs, J.A., 1985. Glutathione reductase is not required for maintenance of  
956 reduced glutathione in *Escherichia coli* K-12. *J. Bacteriol.* 162, 448–450.



- 957 <https://doi.org/10.1128/jb.162.1.448-450.1985>
- 958 Ugalde, J.M., Aller, I., Kudrjasova, L., Schmidt, R.R., Schlößer, M., Homagk, M., Fuchs, P.,  
959 Lichtenauer, S., Schwarzländer, M., Müller-Schüssele, S.J., Meyer, A.J., 2022.  
960 Endoplasmic reticulum oxidoreductin provides resilience against reductive stress and  
961 hypoxic conditions by mediating luminal redox dynamics. *Plant Cell* 34, 4007–4027.  
962 <https://doi.org/10.1093/plcell/koac202>
- 963 Ushioda, R., Nagata, K., 2019. Redox-mediated regulatory mechanisms of endoplasmic  
964 reticulum homeostasis. *Cold Spring Harb. Perspect. Biol.* 11, a033910.
- 965 Vitu, E., Kim, S., Sevier, C.S., Lutzky, O., Heldman, N., Bentzur, M., Unger, T., Yona, M.,  
966 Kaiser, C.A., Fass, D., 2010. Oxidative activity of yeast Ero1p on protein disulfide  
967 isomerase and related oxidoreductases of the endoplasmic reticulum. *J. Biol. Chem.*  
968 285, 18155–18165. <https://doi.org/10.1074/jbc.M109.064931>
- 969 Vivian, J.P., Scoullar, J., Rimmer, K., Bushell, S.R., Beddoe, T., Wilce, M.C.J., Byres, E.,  
970 Boyle, T.P., Doak, B., Simpson, J.S., Graham, B., Heras, B., Kahler, C.M., Rossjohn,  
971 J., Scanlon, M.J., 2009. Structure and function of the oxidoreductase DsbA1 from  
972 *Neisseria meningitidis*. *J. Mol. Biol.* 394, 931–943.  
973 <https://doi.org/10.1016/j.jmb.2009.09.065>
- 974 Wang, Z., Xia, X., Zhang, Meixian, Fang, J., Li, Y., Zhang, Meng, 2018. Purification and  
975 Characterization of Glutathione Binding Protein GsiB from *Escherichia coli*. *BioMed*  
976 *Res. Int.* 2018, 3429569. <https://doi.org/10.1155/2018/3429569>
- 977 Wunderlich, M., Glockshuber, R., 1993. In vivo control of redox potential during protein  
978 folding catalyzed by bacterial protein disulfide-isomerase (DsbA). *J. Biol. Chem.* 268,  
979 24547–24550. [https://doi.org/10.1016/S0021-9258\(19\)74500-1](https://doi.org/10.1016/S0021-9258(19)74500-1)
- 980 Wunderlich, M., Jaenicke, R., Glockshuber, R., 1993. The redox properties of protein  
981 disulfide isomerase (DsbA) of *Escherichia coli* result from a tense conformation of its  
982 oxidized form. *J. Mol. Biol.* 233, 559–566. <https://doi.org/10.1006/jmbi.1993.1535>
- 983 Xie, K., Varatnitskaya, M., Maghnouj, A., Bader, V., Winklhofer, K.F., Hahn, S., Leichert,  
984 L.I., 2020. Activation leads to a significant shift in the intracellular redox homeostasis  
985 of neutrophil-like cells. *Redox Biol.* 28, 101344.  
986 <https://doi.org/10.1016/j.redox.2019.101344>
- 987 Zapun, A., Missiakas, D., Raina, S., Creighton, T.E., 1995. Structural and functional  
988 characterization of DsbC, a protein involved in disulfide bond formation in  
989 *Escherichia coli*. *Biochemistry* 34, 5075–5089. <https://doi.org/10.1021/bi00015a019>
- 990 Zechmann, B., Liou, L.-C., Koffler, B.E., Horvat, L., Tomašić, A., Fulgosi, H., Zhang, Z.,  
991 2011. Subcellular distribution of glutathione and its dynamic changes under oxidative  
992 stress in the yeast *Saccharomyces cerevisiae*. *FEMS Yeast Res.* 11, 631–642.  
993 <https://doi.org/10.1111/j.1567-1364.2011.00753.x>
- 994 Zimmermann, J., Oestreicher, J., Geissel, F., Deponte, M., Morgan, B., 2021. An intracellular  
995 assay for activity screening and characterization of glutathione-dependent  
996 oxidoreductases. *Free Radic. Biol. Med.* 172, 340–349.  
997 <https://doi.org/10.1016/j.freeradbiomed.2021.06.016>
- 998 Zito, E., Melo, E.P., Yang, Y., Wahlander, Å., Neubert, T.A., Ron, D., 2010. Oxidative  
999 protein folding by an endoplasmic reticulum-localized peroxiredoxin. *Mol. Cell* 40,  
1000 787–797. <https://doi.org/10.1016/j.molcel.2010.11.010>

1001 **Supplementary material**

1002 **Supplementary table 1. Bacterial and yeast strains used in this study.**

| <b>Strain</b>                        | <b>Relevant characteristics</b>                                                                                                                      | <b>Reference</b>            |
|--------------------------------------|------------------------------------------------------------------------------------------------------------------------------------------------------|-----------------------------|
| <i>E. coli</i> strains               |                                                                                                                                                      |                             |
| DH5 $\alpha$                         | Cloning host                                                                                                                                         | (Taylor et al., 1993)       |
| BL21 (DE3)                           | Expression host                                                                                                                                      | (Studier and Moffatt, 1986) |
| MG1655                               | Expression host                                                                                                                                      | (Blattner et al., 1997)     |
| <i>E. coli</i> KEIO strains          |                                                                                                                                                      |                             |
| WT (BW25113)                         | $\Delta(\text{araD-araB})567$ , $\Delta\text{lacZ4787}>::\text{rrnB-3}$ , $\lambda$ -, <i>rph-1</i> , $\Delta(\text{rhaD-rhaB})568$ , <i>hsdR514</i> | (Baba et al., 2006)         |
| $\Delta\text{gshA}$ (JW2663)         | BW25113; $\Delta\text{gshA769}>::\text{km}$                                                                                                          |                             |
| $\Delta\text{dsbA}$ (JW3832)         | BW25113; $\Delta\text{dsbA723}>::\text{km}$                                                                                                          |                             |
| $\Delta\text{gshA}\Delta\text{dsbA}$ | BW25113; $\Delta\text{gshA}$ ; $\Delta\text{dsbA723}>::\text{km}$                                                                                    | This study                  |
| $\Delta\text{dsbB}$ (JW5182-1)       | BW25113; $\Delta\text{dsbB774}>::\text{km}$                                                                                                          | (Baba et al., 2006)         |
| Yeast strains                        |                                                                                                                                                      |                             |
| YPH499                               | $\Delta\text{glr1}\Delta\text{grx1}\Delta\text{grx2}$                                                                                                | (Zimmermann et al., 2021)   |

1003

1004 **Supplementary table 2. Plasmids used in this study.**

| <b>Plasmid</b>                            | <b>Relevant characteristics</b>                                              | <b>Reference</b>                                  |
|-------------------------------------------|------------------------------------------------------------------------------|---------------------------------------------------|
| Cloning/ template plasmids                |                                                                              |                                                   |
| pPT                                       | IPTG-inducible, pCC derivative, <i>torA</i>                                  | This study                                        |
| pCC                                       | IPTG-inducible, TAC-MAT-Tag-2 derivative; <i>ptac</i> , Amp <sup>R</sup>     | (Degrossoli et al., 2018; Masuch et al., 2015)    |
| pLK8 (pQE30- <i>roGFP-iL</i> )            | roGFP-iL template, Amp <sup>R</sup>                                          | Addgene, USA, #83313 (Lohman and Remington, 2008) |
| p416TEF_roGFP2-AtPrxA-ΔCP                 | Yeast expression plasmid coding for AtPrxA-ΔCP, Amp <sup>R</sup>             | (Zimmermann et al., 2021)                         |
| <i>E. coli</i> expression plasmids        |                                                                              |                                                   |
| pCC_ <i>roGFP2</i>                        | pTAC-MAT-Tag-2 derivative; <i>roGFP2</i> , <i>ptac</i> , Amp <sup>R</sup>    | (Müller et al., 2017)                             |
| pPT                                       | pTAC-MAT-Tag-2 derivative containing the N-terminal TorA TAT signal sequence | This study                                        |
| pPT_ <i>roGFP2</i>                        | pPT containing <i>roGFP2</i>                                                 | This study                                        |
| pLK9 (pPT_ <i>roGFP-iL</i> )              | pPT containing <i>roGFP-iL</i>                                               | This study                                        |
| pOE1_ <i>dsbAΔSP</i>                      | pET11a-derivative, Strep-tag, TEV-site, <i>dsbAΔSP</i> , Amp <sup>R</sup>    | Lab collection                                    |
| Yeast expression plasmids                 |                                                                              |                                                   |
| pLK16 (p416TEF_roGFP2- <i>EcDsbAΔSP</i> ) | Yeast expression plasmid coding for <i>EcDsbAΔSP</i> , Amp <sup>R</sup>      | This study                                        |
| p415TEF- <i>OPT1</i>                      | Yeast expression plasmid coding for Opt1/Hgt1                                | (Zimmermann et al., 2021)                         |
| p416TEF_ <i>roGFP2</i>                    | Yeast expression plasmid coding for roGFP2                                   | (Zimmermann et al., 2021)                         |
| Removal of kanamycin cassette             |                                                                              |                                                   |
| 709- <i>Flpe</i>                          | <i>flpe</i> , λR promoter, heat-labile cI857 repressor Amp <sup>R</sup>      | Gene Bridges, Germany, #A106                      |

1005

1006 **Supplementary table 3. Oligonucleotides used in this study.** Restriction and mutagenesis

1007 sites are underlined.

| Primer                                                 | Oligonucleotide sequence (5' → 3')  |
|--------------------------------------------------------|-------------------------------------|
| pPT plasmid for periplasmic targeting                  |                                     |
| <i>torA_NdeI-fwd</i>                                   | GGGGGCATATGAACAATAACGATCTCTTTCAG    |
| <i>torA_rev</i>                                        | GGAATACATATGCGCCGCTTGCGCCGAGT       |
| <i>QC-Nde-fw</i>                                       | GGAGATATCGTATGAACAATAACGATCTCTTTCAG |
| <i>QC-Nde-rv</i>                                       | CGTTATTGTCATACGATATCTCTGTGTGAAATTG  |
| pPT_roGFP2 expression plasmid                          |                                     |
| <i>roGFP2_NdeI-fwd</i>                                 | AACCCCATATGGTGAGCAAGGGCGAGGA        |
| <i>roGFP-_EcoR -rev</i>                                | GGGGGAATTCTTACTTGTACAGCTCGTC        |
| pLK9 (pPT_roGFPiL expression plasmid)                  |                                     |
| <i>roGFP-iL_XhoI-fwd</i>                               | AAACTCGAGAAAAAGGAGAAGAAGCTTTTC      |
| <i>roGFP-iL_EcoRI-rev</i>                              | AAAGAATTCTTATTTGTATAGTTCATCCATGC    |
| pLK16<br>(p416TFE_roGFP2_EcDsbAΔSP expression plasmid) |                                     |
| <i>DsbAΔSP_EcoRI-fwd</i>                               | AAAGAATTTCGCGCAGTATGAAGATG          |
| <i>DsbAΔSP_HindIII-fwd</i>                             | TTTAAGCTTTTATTTTTTCTCGGACAGA        |
| <i>gshA</i> removal                                    |                                     |
| <i>gshA_fwd</i>                                        | AAATGTGTCTGTTAGCGGGATGGATGC         |
| <i>gshA_rev</i>                                        | AAAAGGCGCTTCCATCCGGGTATGATC         |
| Δ <i>dsbA</i> insertion                                |                                     |
| <i>dsbA_fwd</i>                                        | AAATTTACGCGCCATGCGTTTGGTTT          |
| <i>dsbA_rev</i>                                        | AAATTACGGCTAACGCAACAATAACAC         |
| KEIO primers (Baba et al., 2006)                       |                                     |
| <i>k1</i>                                              | CAGTCATAGCCGAATAGCCT                |
| <i>k2</i>                                              | GGTGCCCTGAATGAACTGC                 |

1008

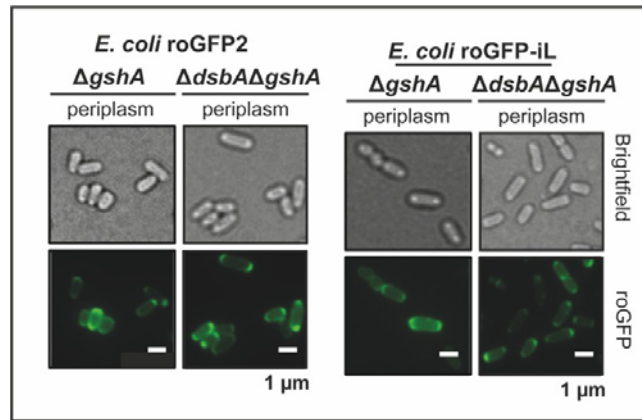

1009

1010 **Supplementary figure 2. roGFP probes localize in the periplasm of cells lacking GshA or DsbA and**  
1011 **GshA.** Fluorescence microscopy of *E. coli*  $\Delta gshA$  and  $\Delta dsbA\Delta gshA$  expressing roGFP2 (left) or roGFP-iL  
1012 (right) confirming periplasmic localization of both roGFP probes.

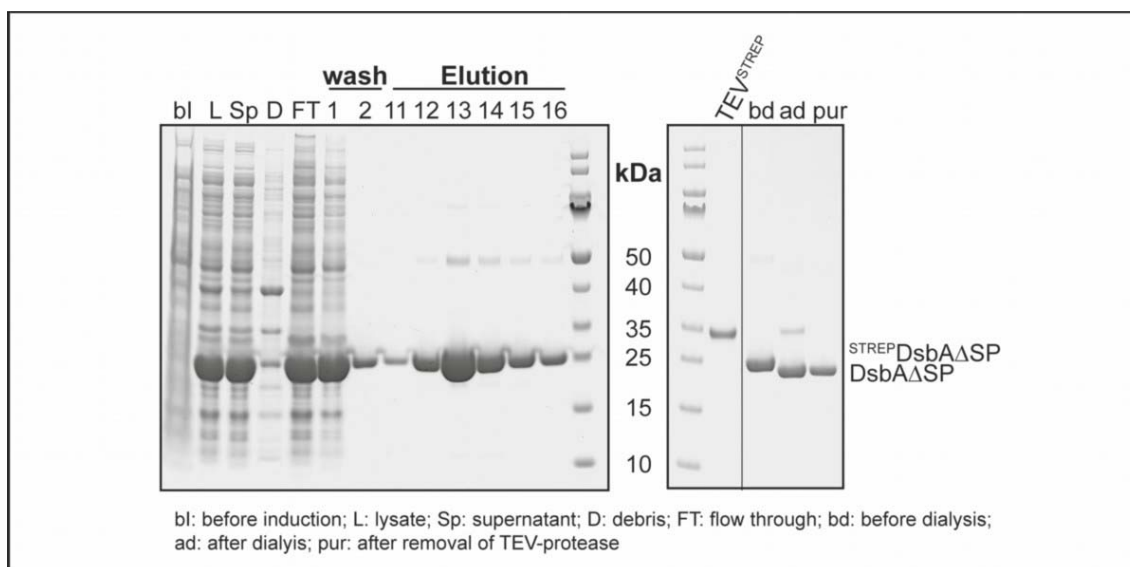

1013

1014 **Supplementary figure 3. Purification of tag-free DsbAΔSP from *E. coli* BL21 cell lysate.** SDS-PAGE  
1015 of samples collected during the purification process. Cells harboring the plasmid for expression of  
1016 <sup>STREP</sup>DsbAΔSP were grown to an OD<sub>600</sub> of 0.6-0.8 (bl) before expression was induced for 20 h at 20 °C.  
1017 Then cells were harvested and lysed (L) and the lysate was separated by centrifugation (30 min, 4 °C,  
1018 25.000 x g) into supernatant (Sp) and debris (D). The supernatant was loaded onto a Streptavidin column  
1019 (StrepTrap<sup>TM</sup>, GE Healthcare, Chicago, USA), washed with 5 CV buffer W (100 mM Tris-HCl, 150 mM  
1020 NaCl, 1 mM EDTA, pH 8.0) and eluted with buffer E (100 mM Tris-HCl, 150 mM NaCl, 1 mM EDTA, 2.5  
1021 mM Desthiobiotin, pH 8.0) with the help of ÄKTApurifier (GE-Healthcare, Chicago, USA). Elution  
1022 fractions were incubated over night at 4 °C during dialysis to buffer W with Strep-tagged TEV-protease  
1023 (1:20 TEV<sup>STREP</sup>: <sup>STREP</sup>DsbAΔSP) to get tag-free DsbA. The TEV-protease and uncleaved <sup>STREP</sup>DsbAΔSP  
1024 were removed using a Streptavidin column resulting in pure DsbAΔSP (pur).

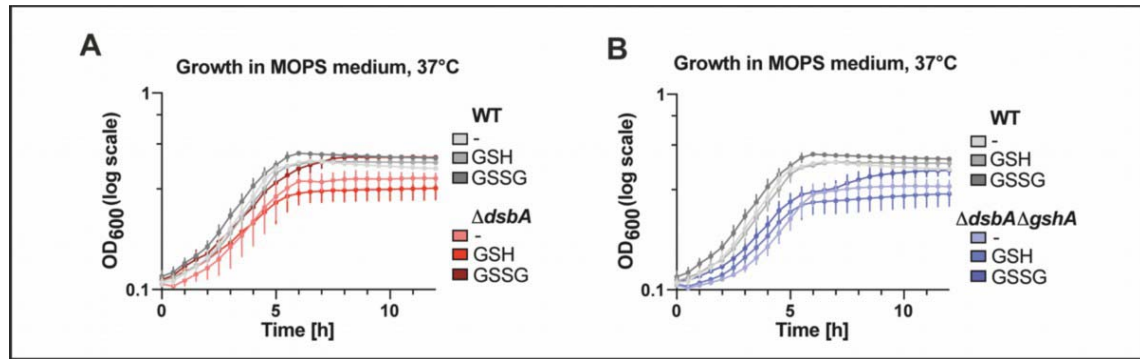

1025

1026 **Supplementary figure 3. Supplementation of the growth medium with oxidized glutathione rescues**  
1027 **growth of DsbA-deficient cells, while GSH has an inhibitory effect.** *E. coli* WT (A and B),  $\Delta dsbA$  (A)  
1028 and  $\Delta gshA\Delta dsbA$  (B) were cultivated at 37 °C in MOPS minimal medium without or with supplementation  
1029 of 5 mM GSH or GSSG. OD<sub>600</sub> was recorded over time and for better visualization y-axis is shown in log  
1030 scale. Presented values are the mean of three biological replicates recorded in duplicate assays and error  
1031 bars represent the standard deviation.

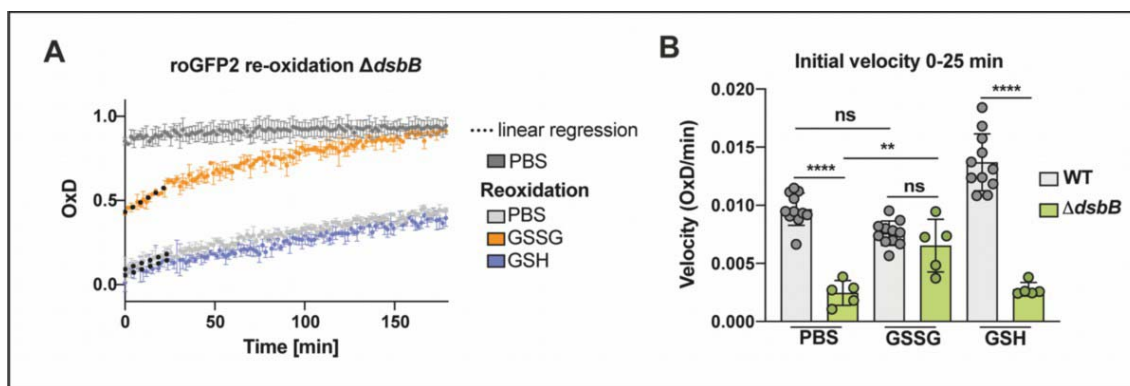

1032

1033 **Supplementary figure 4. External addition of oxidized glutathione rescues the reoxidation of roGFP2**  
1034 **in the periplasm of cells lacking DsbB.** (A) Reoxidation of periplasmic roGFP2 in *E. coli*  $\Delta dsbB$ .  
1035 Periplasmic reoxidation assay of roGFP2 in *E. coli*  $\Delta dsbB$  was carried out as described in Fig. 3. One  
1036 representative example out of at least five individual repeats is shown. Error bars represent standard  
1037 deviation of technical triplicates. (B) The initial reoxidation velocity was calculated from linear regression  
1038 in the first 25 min (dashed lines). Values (circles) are the mean of three technical replicates recorded in a  
1039 minimum of five independent repeats. Error bars represent the standard deviation. Significance test was  
1040 performed using one way ANOVA. \*\* $p < 0.01$ , \*\*\*\* $p < 0.0001$ .



- 1041 Baba, T., Ara, T., Hasegawa, M., Takai, Y., Okumura, Y., Baba, M., Datsenko, K.A., Tomita,  
1042 M., Wanner, B.L., Mori, H., 2006. Construction of *Escherichia coli* K-12 in-frame,  
1043 single-gene knockout mutants: the Keio collection. *Molecular Systems Biology* 2,  
1044 2006.0008. <https://doi.org/10.1038/msb4100050>
- 1045 Blattner, F.R., Plunkett, G., Bloch, C.A., Perna, N.T., Burland, V., Riley, M., Collado-Vides,  
1046 J., Glasner, J.D., Rode, C.K., Mayhew, G.F., Gregor, J., Davis, N.W., Kirkpatrick,  
1047 H.A., Goeden, M.A., Rose, D.J., Mau, B., Shao, Y., 1997. The Complete Genome  
1048 Sequence of *Escherichia coli* K-12. *Science* 277, 1453–1462.  
1049 <https://doi.org/10.1126/science.277.5331.1453>
- 1050 Degrossoli, A., Müller, A., Xie, K., Schneider, J.F., Bader, V., Winklhofer, K.F., Meyer, A.J.,  
1051 Leichert, L.I., 2018. Neutrophil-generated HOCl leads to non-specific thiol oxidation  
1052 in phagocytized bacteria. *eLife* 7, e32288. <https://doi.org/10.7554/eLife.32288>
- 1053 Lohman, J.R., Remington, S.J., 2008. Development of a family of redox-sensitive green  
1054 fluorescent protein indicators for use in relatively oxidizing subcellular environments.  
1055 *Biochemistry* 47, 8678–8688. <https://doi.org/10.1021/bi800498g>
- 1056 Masuch, T., Kusnezowa, A., Nilewski, S., Bautista, J.T., Kourist, R., Leichert, L.I., 2015. A  
1057 combined bioinformatics and functional metagenomics approach to discovering  
1058 lipolytic biocatalysts. *Frontiers in Microbiology* 6.  
1059 <https://doi.org/10.3389/fmicb.2015.01110>
- 1060 Müller, A., Schneider, J.F., Degrossoli, A., Lupilova, N., Dick, T.P., Leichert, L.I., 2017.  
1061 Systematic *in vitro* assessment of responses of roGFP2-based probes to  
1062 physiologically relevant oxidant species. *Free Radical Biology and Medicine* 106,  
1063 329–338. <https://doi.org/10.1016/j.freeradbiomed.2017.02.044>
- 1064 Studier, F.W., Moffatt, B.A., 1986. Use of bacteriophage T7 RNA polymerase to direct  
1065 selective high-level expression of cloned genes. *Journal of Molecular Biology* 189,  
1066 113–130. [https://doi.org/10.1016/0022-2836\(86\)90385-2](https://doi.org/10.1016/0022-2836(86)90385-2)
- 1067 Taylor, R.G., Walker, D.C., McInnes, R.R., 1993. *E. coli* host strains significantly affect the  
1068 quality of small scale plasmid DNA preparations used for sequencing. *Nucleic Acids*  
1069 *Research* 21, 1677–1678. <https://doi.org/10.1093/nar/21.7.1677>
- 1070 Zimmermann, J., Oestreicher, J., Geissel, F., Deponte, M., Morgan, B., 2021. An intracellular  
1071 assay for activity screening and characterization of glutathione-dependent  
1072 oxidoreductases. *Free Radical Biology and Medicine* 172, 340–349.  
1073 <https://doi.org/10.1016/j.freeradbiomed.2021.06.016>
